# Supplementary material for: Electronic effects on the mechanism of the NAD+ coenzyme reduction catalysed by a non-organometallic ruthenium(ii) polypyridyl amine complex in the presence of formate
Source: Royal Society of Chemistry journal article supplement (doi:10.1039/d2ra01890j), 2022-01-01
Supplement: d2ra01890j1.pdf [file d2ra01890j1.pdf]

## Supporting Information

### **Electronic effects on the mechanism of the NAD<sup>+</sup> coenzyme reduction catalysed by non-organometallic ruthenium(II) polypyridyl amine complex in the presence of formate**

Marta Chrzanowska,<sup>a</sup> Anna Katafias<sup>a</sup>, Rudi van Eldik<sup>a,b\*</sup> and Jeanet Conradie<sup>c,d\*</sup>

<sup>a</sup> Faculty of Chemistry, Nicolaus Copernicus University in Toruń, Gagarina 7, 87-100 Toruń, Poland

<sup>b</sup> Department of Chemistry and Pharmacy, University of Erlangen-Nuremberg, Egerlandstr. 1, 91058 Erlangen, Germany

<sup>c</sup> Faculty of Natural and Agricultural Sciences, University of the Free State, Bloemfontein 9300, Republic of South Africa

<sup>d</sup> Department of Chemistry, UiT - The Arctic University of Norway, N-9037 Tromsø, Norway

[\\*rudi.vaneldik@fau.de](mailto:rudi.vaneldik@fau.de); [ConradJ@ufs.ac.za](mailto:ConradJ@ufs.ac.za)

**Table S1.** Values of the initial rate and pseudo-first order rate constant as a function of the  $[\text{HCOO}^-]$  for the catalysed reduction of  $\text{NAD}^+$  to 1,4-NADH in water/ethanol (1:9, v/v) solution,  $T = 36.8$  °C.

| $[\text{HCOO}^-]$ , mM | $10^5 r$ , $\text{M h}^{-1}$ , 340 nm | $10^6 r$ , $\text{M h}^{-1}$ , 340 nm<br>(10 points) | $10^6 k_{\text{obs}}$ , $\text{s}^{-1}$ |
|------------------------|---------------------------------------|------------------------------------------------------|-----------------------------------------|
| 58                     | $8.97 \pm 0.01$                       | -                                                    | -                                       |
| 43.5                   | $8.97 \pm 0.01$                       | -                                                    | -                                       |
| 29                     | $8.45 \pm 0.01$                       | -                                                    | -                                       |
| 22                     | $8.45 \pm 0.01$                       | -                                                    | -                                       |
| 14.5                   | $8.28 \pm 0.01$                       | -                                                    | -                                       |
| 7.2                    | $6.48 \pm 0.01$                       | -                                                    | -                                       |
| 2.2                    | -                                     | $4.40 \pm 0.04$                                      | -                                       |
| 1.65                   | -                                     | $3.70 \pm 0.04$                                      | -                                       |
| 1.35                   | -                                     | $3.21 \pm 0.03$                                      | $9.1 \pm 0.1$                           |
| 1.1                    | -                                     | $2.79 \pm 0.03$                                      | $10.4 \pm 0.1$                          |
| 0.86                   | -                                     | $2.48 \pm 0.02$                                      | $9.5 \pm 0.2$                           |
| 0.56                   | -                                     | $1.59 \pm 0.01$                                      | $13.2 \pm 0.8$                          |

**Table S2.** Values of the initial rate and pseudo-first order rate constants as a function of the  $[\text{Ru(II)}]$  for the catalysed reduction of  $\text{NAD}^+$  to 1,4-NADH in water/ethanol (1:9, v/v) solution,  $T = 36.8$  °C.

| $10^3 [\text{NAD}^+]$ , mM | $10^3 [\text{Ru(II)}]$ , mM | $[\text{HCOO}^-]$ , mM                    |                                         |                              |
|----------------------------|-----------------------------|-------------------------------------------|-----------------------------------------|------------------------------|
|                            |                             | 1.1                                       |                                         | 43.5                         |
|                            |                             | $10^6 r$ , $\text{M h}^{-1}$<br>10 points | $10^6 k_{\text{obs}}$ , $\text{s}^{-1}$ | $10^5 r$ , $\text{M h}^{-1}$ |
| 310                        | 106                         | $5.04 \pm 0.06$                           | $9.9 \pm 0.1$                           | $1.99 \pm 0.03$              |
|                            | 79                          | $4.50 \pm 0.06$                           | $9.6 \pm 0.1$                           | $1.44 \pm 0.01$              |
|                            | 63.6                        | $3.62 \pm 0.05$                           | $9.9 \pm 0.2$                           | $1.15 \pm 0.01$              |
|                            | 53                          | $2.78 \pm 0.03$                           | $10.1 \pm 0.1$                          | $0.90 \pm 0.01$              |
|                            | 42.4                        | $2.49 \pm 0.03$                           | $9.9 \pm 0.2$                           | $0.71 \pm 0.01$              |
|                            | 26.5                        | $1.68 \pm 0.03$                           | $9.7 \pm 0.3$                           | $0.46 \pm 0.01$              |

**Table S3.** Values of the initial rate and pseudo-first order rate constants as a function of the  $[\text{NAD}^+]$  for the catalysed reduction of  $\text{NAD}^+$  to 1,4-NADH in water/ethanol (1:9, v/v) solution,  $T = 36.8\text{ }^\circ\text{C}$ .

| [Ru(II)], mM | [NAD <sup>+</sup> ], mM | [HCOO <sup>-</sup> ], mM               |                                      |                           |
|--------------|-------------------------|----------------------------------------|--------------------------------------|---------------------------|
|              |                         | 1.1                                    |                                      | 43.5                      |
|              |                         | $10^6 r, \text{M h}^{-1}$<br>10 points | $10^6 k_{\text{obs}}, \text{s}^{-1}$ | $10^5 r, \text{M h}^{-1}$ |
| 0.053        | 0.40                    | $2.97 \pm 0.05$                        | $15.0 \pm 0.4$                       | $0.89 \pm 0.01$           |
|              | 0.31                    | $2.78 \pm 0.03$                        | $10.1 \pm 0.1$                       | $0.90 \pm 0.01$           |
|              | 0.25                    | $3.03 \pm 0.03$                        | $7.95 \pm 0.06$                      | $0.89 \pm 0.01$           |
|              | 0.20                    | $3.06 \pm 0.04$                        | $6.84 \pm 0.01$                      | $0.91 \pm 0.01$           |
|              | 0.15                    | $2.97 \pm 0.06$                        | $6.0 \pm 0.2$                        | $0.88 \pm 0.01$           |

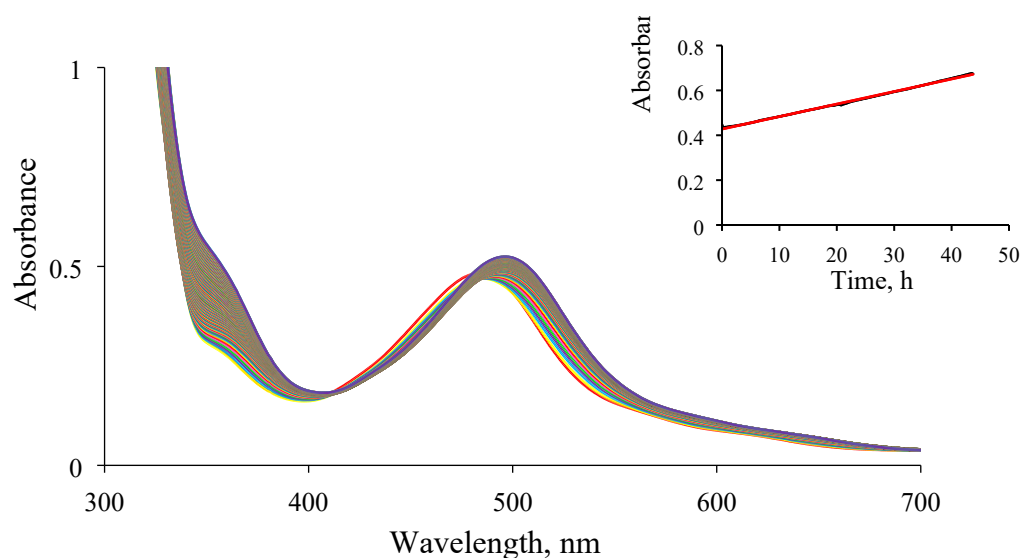

**Figure S1.** Spectral changes observed during the reduction of  $\text{NAD}^+$  to 1,4-NADH in the presence of formate in water/ethanol (1:9, v/v) solution catalysed by  $[\text{Ru}(\text{terpy})(\text{bipy})(\text{H}_2\text{O}/\text{EtOH})]^{2+}$ . Experimental conditions:  $[\text{HCOO}^-] = 58\text{ mM}$ ;  $[\text{Ru}(\text{II})] = 0.053\text{ mM}$ ,  $[\text{NAD}^+] = 0.31\text{ mM}$ ,  $T = 36.8\text{ }^\circ\text{C}$ ; spectra recorded every 15 min. Inset: kinetic trace recorded at 340 nm.

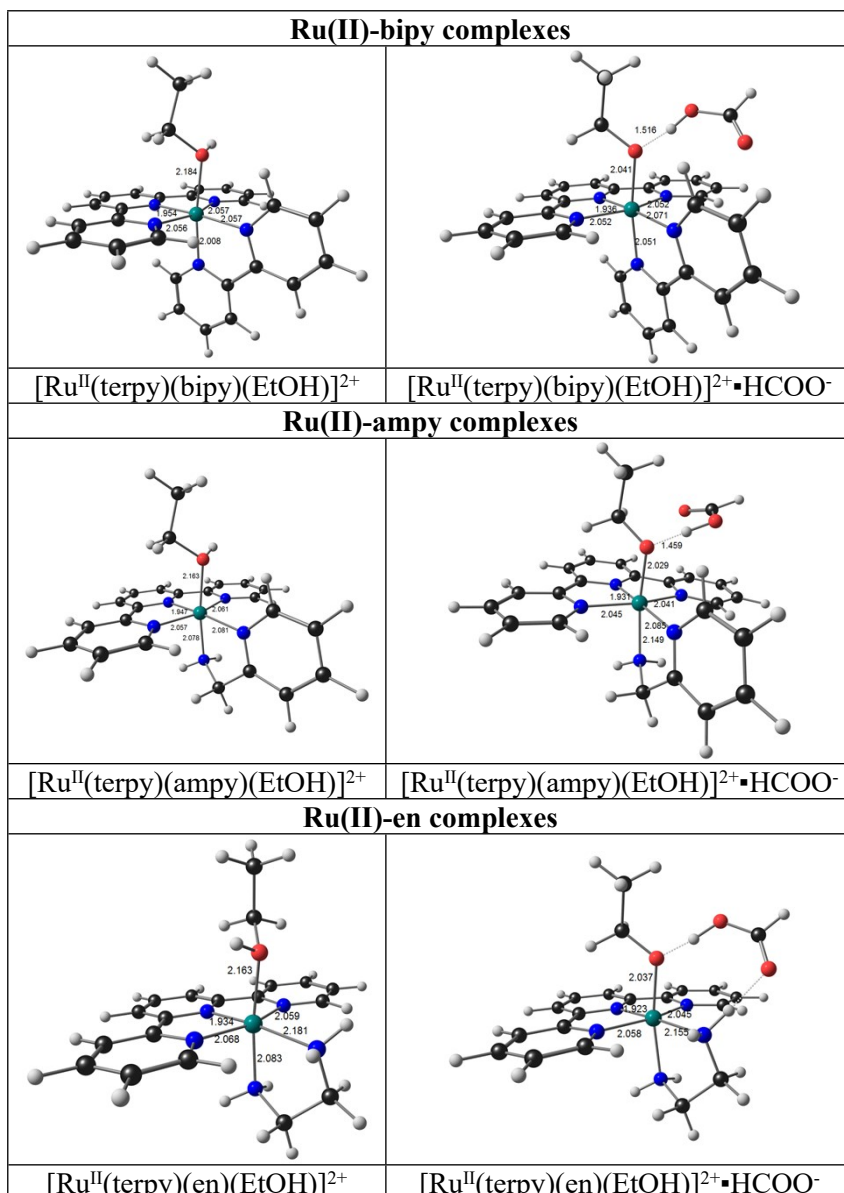

**Figure S2.** Structures of [Ru<sup>II</sup>(terpy)(N<sup>^</sup>N)(EtOH)]<sup>2+</sup> and {[Ru<sup>II</sup>(terpy)(N<sup>^</sup>N)(EtOH)]<sup>2+</sup>·HCOO<sup>-</sup>} complexes predicted for the conversion of [Ru<sup>II</sup>(terpy)(N<sup>^</sup>N)(EtOH)]<sup>2+</sup> into [Ru<sup>II</sup>(terpy)(N<sup>^</sup>N)H]<sup>+</sup> by DFT calculations. Colour scheme used for atoms (online version): Ru (green), O (red), C (black), N (blue), and H (white).

Optimized Cartesian coordinates (Å)



All compounds were optimized by the ZORA Hamiltonian, ZORA/TZ2P basis set, all electron, OLYP functional.

### Table of Contents

|                                                                                                                                                        |    |
|--------------------------------------------------------------------------------------------------------------------------------------------------------|----|
| Table of Contents .....                                                                                                                                | 5  |
| 1. $[\text{Ru}^{\text{II}}(\text{terpy})(\text{bipy})(\text{H}_2\text{O})]^{2+}$ .....                                                                 | 6  |
| 2. $[\text{Ru}^{\text{II}}(\text{terpy})(\text{bipy})(\text{H}_2\text{O})]^{2+}\bullet\text{HCOO}^-$ .....                                             | 7  |
| 3. $[\text{Ru}^{\text{II}}(\text{terpy})(\text{bipy})(\text{HCOO})]^+$ .....                                                                           | 8  |
| 4. $\text{Ru}^{\text{II}}(\text{terpy})(\text{bipy})(\text{H})]^+$ .....                                                                               | 9  |
| 5. $[\text{Ru}^{\text{II}}(\text{terpy})(\text{ampy})(\text{H}_2\text{O})]^{2+}$ .....                                                                 | 11 |
| 6. $[\text{Ru}^{\text{II}}(\text{terpy})(\text{ampy})(\text{H}_2\text{O})]^{2+}\bullet\text{HCOO}^-$ .....                                             | 12 |
| 7. $[\text{Ru}^{\text{II}}(\text{terpy})(\text{ampy})(\text{HCOO})]^+$ .....                                                                           | 13 |
| 8. $\text{Ru}^{\text{II}}(\text{terpy})(\text{ampy})(\text{H})]^+$ .....                                                                               | 14 |
| 9. $[\text{Ru}^{\text{II}}(\text{terpy})(\text{en})(\text{H}_2\text{O})]^{2+}$ .....                                                                   | 15 |
| 10. $[\text{Ru}^{\text{II}}(\text{terpy})(\text{en})(\text{H}_2\text{O})]^{2+}\bullet\text{HCOO}^-$ .....                                              | 17 |
| 11. $[\text{Ru}^{\text{II}}(\text{terpy})(\text{en})(\text{HCOO})]^+$ .....                                                                            | 18 |
| 12. $\text{Ru}^{\text{II}}(\text{terpy})(\text{en})(\text{H})]^+$ .....                                                                                | 19 |
| 13. $[\text{Ru}^{\text{II}}(\text{terpy})(\text{bipy})(\text{EtOH})]^{2+}$ .....                                                                       | 20 |
| 14. $[\text{Ru}^{\text{II}}(\text{terpy})(\text{bipy})(\text{EtOH})]^{2+}\bullet\text{HCOO}^-$ .....                                                   | 21 |
| 15. $[\text{Ru}^{\text{II}}(\text{terpy})(\text{ampy})(\text{EtOH})]^{2+}$ .....                                                                       | 23 |
| 16. $[\text{Ru}^{\text{II}}(\text{terpy})(\text{ampy})(\text{EtOH})]^{2+}\bullet\text{HCOO}^-$ .....                                                   | 24 |
| 17. $[\text{Ru}^{\text{II}}(\text{terpy})(\text{en})(\text{EtOH})]^{2+}$ .....                                                                         | 26 |
| 18. $[\text{Ru}^{\text{II}}(\text{terpy})(\text{en})(\text{EtOH})]^{2+}\bullet\text{HCOO}^-$ .....                                                     | 27 |
| 19. Reaction intermediate 1: $[\text{Ru}^{\text{II}}(\text{terpy})(\text{N}^{\wedge}\text{N})(\text{H})(\text{CO}_2)]^+$ ( $\Delta E = 0.32$ eV) ..... | 28 |
| 20. Reaction intermediate 2: $[\text{Ru}^{\text{II}}(\text{terpy})(\text{N}^{\wedge}\text{N})(\text{H})(\text{CO}_2)]^+$ ( $\Delta E = 1.00$ eV) ..... | 30 |
| 21. Reaction intermediate 3: $[\text{Ru}^{\text{II}}(\text{terpy})(\text{N}^{\wedge}\text{N})(\text{H})(\text{CO}_2)]^+$ ( $\Delta E = 0.44$ eV) ..... | 31 |
| 22. Reaction intermediate 4: $[\text{Ru}^{\text{II}}(\text{terpy})(\text{N}^{\wedge}\text{N})(\text{H})(\text{CO}_2)]^+$ ( $\Delta E = 0.34$ eV) ..... | 32 |
| 23. Reaction intermediate 5: $[\text{Ru}^{\text{II}}(\text{terpy})(\text{N}^{\wedge}\text{N})(\text{H})(\text{CO}_2)]^+$ ( $\Delta E = 0.13$ eV) ..... | 33 |
| 24. Reaction intermediate 6: $[\text{Ru}^{\text{II}}(\text{terpy})(\text{N}^{\wedge}\text{N})(\text{H})(\text{CO}_2)]^+$ ( $\Delta E = 0.00$ eV) ..... | 35 |

1.  $[\text{Ru}^{\text{II}}(\text{terpy})(\text{bipy})(\text{H}_2\text{O})]^{2+}$

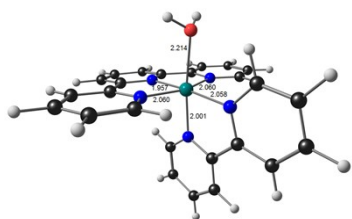

|    |              |              |              |
|----|--------------|--------------|--------------|
| Ru | -3.454626000 | 2.823203000  | 2.912004000  |
| N  | -3.066911000 | 0.826610000  | 3.238611000  |
| C  | -3.229206000 | 0.130467000  | 4.381008000  |
| H  | -3.590641000 | 0.696330000  | 5.232786000  |
| C  | -2.950513000 | -1.228506000 | 4.476957000  |
| H  | -3.098421000 | -1.741859000 | 5.422487000  |
| C  | -2.482283000 | -1.903231000 | 3.350177000  |
| H  | -2.256688000 | -2.965188000 | 3.392415000  |
| C  | -2.308707000 | -1.194750000 | 2.163722000  |
| H  | -1.949768000 | -1.699507000 | 1.273526000  |
| C  | -2.602045000 | 0.167790000  | 2.120988000  |
| C  | -2.462372000 | 1.006018000  | 0.921919000  |
| C  | -1.935971000 | 0.635924000  | -0.316109000 |
| H  | -1.578709000 | -0.373487000 | -0.486006000 |
| C  | -1.865455000 | 1.587411000  | -1.334919000 |
| H  | -1.451272000 | 1.315168000  | -2.301457000 |
| C  | -2.324650000 | 2.887322000  | -1.116932000 |
| H  | -2.270625000 | 3.625546000  | -1.909143000 |
| C  | -2.842676000 | 3.222350000  | 0.134590000  |
| N  | -2.887088000 | 2.283810000  | 1.118754000  |
| C  | -3.346491000 | 4.531066000  | 0.572049000  |
| C  | -3.463064000 | 5.643841000  | -0.260268000 |
| H  | -3.170420000 | 5.573398000  | -1.302168000 |
| C  | -3.958216000 | 6.841292000  | 0.250140000  |
| H  | -4.052327000 | 7.713143000  | -0.391326000 |
| C  | -4.332007000 | 6.899359000  | 1.592104000  |
| H  | -4.723567000 | 7.812480000  | 2.030547000  |
| C  | -4.195954000 | 5.761260000  | 2.379563000  |
| H  | -4.468856000 | 5.762525000  | 3.429400000  |
| N  | -3.718395000 | 4.596810000  | 1.897574000  |
| N  | -3.877301000 | 3.414495000  | 4.836967000  |
| C  | -5.089907000 | 3.395372000  | 5.430699000  |
| H  | -5.913032000 | 3.048187000  | 4.816888000  |
| C  | -5.283599000 | 3.790646000  | 6.747095000  |
| H  | -6.280501000 | 3.754694000  | 7.176309000  |
| C  | -4.186999000 | 4.228176000  | 7.491728000  |
| H  | -4.305444000 | 4.544326000  | 8.524195000  |
| C  | -2.935001000 | 4.253447000  | 6.887878000  |
| H  | -2.070240000 | 4.589371000  | 7.448141000  |
| C  | -2.797991000 | 3.843074000  | 5.559377000  |
| C  | -1.536983000 | 3.825395000  | 4.819425000  |
| N  | -1.631105000 | 3.370440000  | 3.528149000  |

|   |              |             |             |
|---|--------------|-------------|-------------|
| O | -5.572168000 | 2.309602000 | 2.519987000 |
| H | -5.986606000 | 2.816459000 | 1.805554000 |
| H | -5.732974000 | 1.377964000 | 2.307143000 |
| C | -0.514161000 | 3.327897000 | 2.768065000 |
| C | -0.307535000 | 4.235566000 | 5.340471000 |
| C | 0.726865000  | 3.725968000 | 3.241860000 |
| C | 0.835665000  | 4.189447000 | 4.552388000 |
| H | -0.632212000 | 2.963709000 | 1.757121000 |
| H | -0.247193000 | 4.594059000 | 6.361218000 |
| H | 1.590561000  | 3.671470000 | 2.585875000 |
| H | 1.793296000  | 4.509835000 | 4.952904000 |

## 2. $[\text{Ru}^{\text{II}}(\text{terpy})(\text{bipy})(\text{H}_2\text{O})]^{2+} \bullet \text{HCOO}^-$

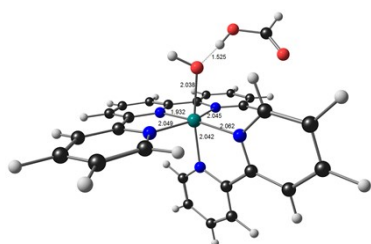

|    |              |              |              |
|----|--------------|--------------|--------------|
| Ru | -3.424361000 | 2.586234000  | 2.888780000  |
| N  | -2.981675000 | 0.615202000  | 3.228804000  |
| C  | -3.112037000 | -0.069433000 | 4.381835000  |
| H  | -3.515718000 | 0.490861000  | 5.217715000  |
| C  | -2.753174000 | -1.405151000 | 4.504633000  |
| H  | -2.872420000 | -1.907784000 | 5.459752000  |
| C  | -2.245636000 | -2.074988000 | 3.389718000  |
| H  | -1.955904000 | -3.120022000 | 3.453511000  |
| C  | -2.118132000 | -1.383136000 | 2.190253000  |
| H  | -1.732392000 | -1.881467000 | 1.307662000  |
| C  | -2.487463000 | -0.038334000 | 2.121633000  |
| C  | -2.393689000 | 0.788612000  | 0.917245000  |
| C  | -1.909262000 | 0.415796000  | -0.335571000 |
| H  | -1.545758000 | -0.591317000 | -0.506751000 |
| C  | -1.899371000 | 1.354159000  | -1.369403000 |
| H  | -1.522674000 | 1.077414000  | -2.349397000 |
| C  | -2.377554000 | 2.646156000  | -1.145455000 |
| H  | -2.377116000 | 3.376144000  | -1.947157000 |
| C  | -2.853134000 | 2.990580000  | 0.118997000  |
| N  | -2.838019000 | 2.064398000  | 1.123085000  |
| C  | -3.360959000 | 4.288765000  | 0.560320000  |
| C  | -3.513275000 | 5.399036000  | -0.269912000 |
| H  | -3.260860000 | 5.324360000  | -1.321843000 |
| C  | -3.999416000 | 6.591103000  | 0.255656000  |
| H  | -4.132587000 | 7.458249000  | -0.384942000 |
| C  | -4.318715000 | 6.648861000  | 1.612208000  |
| H  | -4.714806000 | 7.553388000  | 2.063227000  |
| C  | -4.150135000 | 5.515417000  | 2.396068000  |

|   |              |             |             |
|---|--------------|-------------|-------------|
| H | -4.433267000 | 5.502233000 | 3.439576000 |
| N | -3.689191000 | 4.354899000 | 1.896002000 |
| N | -3.891381000 | 3.176213000 | 4.808651000 |
| C | -5.120805000 | 3.098147000 | 5.354730000 |
| H | -5.889343000 | 2.704146000 | 4.703430000 |
| C | -5.378925000 | 3.524545000 | 6.650033000 |
| H | -6.389804000 | 3.455217000 | 7.039501000 |
| C | -4.338034000 | 4.049644000 | 7.415781000 |
| H | -4.511988000 | 4.395184000 | 8.430804000 |
| C | -3.066760000 | 4.129190000 | 6.857046000 |
| H | -2.242421000 | 4.532956000 | 7.433099000 |
| C | -2.861356000 | 3.684961000 | 5.549133000 |
| C | -1.573710000 | 3.702061000 | 4.855387000 |
| N | -1.604331000 | 3.200863000 | 3.580185000 |
| O | -5.380721000 | 2.122326000 | 2.557049000 |
| H | -6.334828000 | 3.191445000 | 2.036654000 |
| H | -5.480680000 | 1.297288000 | 2.066756000 |
| C | -7.314391000 | 4.787644000 | 2.570399000 |
| O | -7.016534000 | 3.874251000 | 1.660284000 |
| O | -6.824593000 | 4.898493000 | 3.682707000 |
| H | -8.086491000 | 5.482068000 | 2.187533000 |
| C | -0.455153000 | 3.166187000 | 2.869523000 |
| C | -0.380611000 | 4.173103000 | 5.410950000 |
| C | 0.753085000  | 3.619689000 | 3.374283000 |
| C | 0.794107000  | 4.135469000 | 4.671267000 |
| H | -0.528227000 | 2.764600000 | 1.866564000 |
| H | -0.374975000 | 4.569397000 | 6.419474000 |
| H | 1.644484000  | 3.570637000 | 2.755844000 |
| H | 1.724030000  | 4.502862000 | 5.095842000 |

### 3. [Ru<sup>II</sup>(terpy)(bipy)(HCOO)]<sup>+</sup>

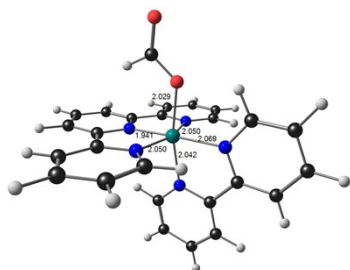

|    |              |              |             |
|----|--------------|--------------|-------------|
| Ru | -3.423143000 | 2.868397000  | 2.957125000 |
| N  | -3.082330000 | 0.869754000  | 3.260679000 |
| C  | -3.204642000 | 0.182984000  | 4.413845000 |
| H  | -3.515235000 | 0.761844000  | 5.276274000 |
| C  | -2.960114000 | -1.180720000 | 4.501469000 |
| H  | -3.077290000 | -1.687090000 | 5.454950000 |
| C  | -2.577639000 | -1.874571000 | 3.351943000 |
| H  | -2.384713000 | -2.943052000 | 3.387599000 |
| C  | -2.453341000 | -1.177801000 | 2.154866000 |
| H  | -2.164442000 | -1.694900000 | 1.246785000 |
| C  | -2.709390000 | 0.194016000  | 2.119676000 |

|   |              |              |              |
|---|--------------|--------------|--------------|
| C | -2.633692000 | 1.021484000  | 0.915040000  |
| C | -2.375416000 | 0.603352000  | -0.388550000 |
| H | -2.166585000 | -0.439518000 | -0.598799000 |
| C | -2.417411000 | 1.536675000  | -1.426196000 |
| H | -2.232192000 | 1.219070000  | -2.447791000 |
| C | -2.714180000 | 2.873503000  | -1.156125000 |
| H | -2.767519000 | 3.595744000  | -1.962922000 |
| C | -2.968581000 | 3.263822000  | 0.157387000  |
| N | -2.925251000 | 2.334817000  | 1.159058000  |
| C | -3.357429000 | 4.591085000  | 0.635658000  |
| C | -3.472837000 | 5.721813000  | -0.175183000 |
| H | -3.258905000 | 5.647965000  | -1.235544000 |
| C | -3.868777000 | 6.933913000  | 0.379591000  |
| H | -3.965829000 | 7.817677000  | -0.244664000 |
| C | -4.144805000 | 6.993303000  | 1.746884000  |
| H | -4.463106000 | 7.917469000  | 2.219899000  |
| C | -4.017847000 | 5.840317000  | 2.509467000  |
| H | -4.234370000 | 5.834638000  | 3.571909000  |
| N | -3.631874000 | 4.660582000  | 1.983848000  |
| N | -3.879185000 | 3.443518000  | 4.891067000  |
| C | -5.121741000 | 3.432097000  | 5.423430000  |
| H | -5.904991000 | 3.099236000  | 4.749153000  |
| C | -5.364727000 | 3.816421000  | 6.735050000  |
| H | -6.380298000 | 3.789876000  | 7.119086000  |
| C | -4.296724000 | 4.230133000  | 7.534683000  |
| H | -4.457879000 | 4.536360000  | 8.564574000  |
| C | -3.017335000 | 4.244327000  | 6.991115000  |
| H | -2.173599000 | 4.560339000  | 7.593889000  |
| C | -2.825094000 | 3.846993000  | 5.664582000  |
| C | -1.531480000 | 3.812193000  | 4.981338000  |
| N | -1.583037000 | 3.376648000  | 3.681124000  |
| O | -5.393661000 | 2.484211000  | 2.663621000  |
| C | -5.968718000 | 1.966142000  | 1.600587000  |
| O | -7.155970000 | 1.720126000  | 1.516084000  |
| H | -5.281870000 | 1.762246000  | 0.751546000  |
| C | -0.432324000 | 3.308327000  | 2.973200000  |
| C | -0.315851000 | 4.179531000  | 5.565387000  |
| C | 0.797038000  | 3.660994000  | 3.506596000  |
| C | 0.859771000  | 4.106226000  | 4.829108000  |
| H | -0.526562000 | 2.958515000  | 1.951984000  |
| H | -0.292214000 | 4.521968000  | 6.593358000  |
| H | 1.689062000  | 3.586404000  | 2.891607000  |
| H | 1.807906000  | 4.390531000  | 5.276549000  |

#### 4. Ru<sup>II</sup> (terpy) (bipy) (H) ]<sup>+</sup>

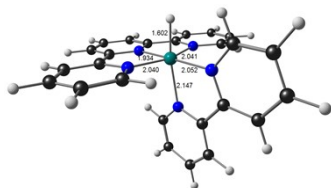

|    |              |              |              |
|----|--------------|--------------|--------------|
| Ru | -3.358920000 | 2.758066000  | 2.883829000  |
| N  | -3.054497000 | 0.762144000  | 3.173598000  |
| C  | -3.223731000 | 0.062744000  | 4.315595000  |
| H  | -3.572720000 | 0.634044000  | 5.168502000  |
| C  | -2.977839000 | -1.299485000 | 4.406166000  |
| H  | -3.134857000 | -1.810671000 | 5.351366000  |
| C  | -2.532632000 | -1.986960000 | 3.273963000  |
| H  | -2.333145000 | -3.053894000 | 3.313400000  |
| C  | -2.349150000 | -1.279129000 | 2.092331000  |
| H  | -2.004549000 | -1.784795000 | 1.197044000  |
| C  | -2.612980000 | 0.091564000  | 2.052922000  |
| C  | -2.478624000 | 0.928338000  | 0.863948000  |
| C  | -2.067700000 | 0.538091000  | -0.409333000 |
| H  | -1.788018000 | -0.491594000 | -0.601765000 |
| C  | -2.025233000 | 1.483772000  | -1.434935000 |
| H  | -1.707370000 | 1.191457000  | -2.430966000 |
| C  | -2.396071000 | 2.804648000  | -1.180055000 |
| H  | -2.371494000 | 3.543072000  | -1.973562000 |
| C  | -2.799762000 | 3.166521000  | 0.104075000  |
| N  | -2.829682000 | 2.229497000  | 1.100386000  |
| C  | -3.231708000 | 4.482441000  | 0.565756000  |
| C  | -3.323247000 | 5.616525000  | -0.243935000 |
| H  | -3.054327000 | 5.550027000  | -1.292334000 |
| C  | -3.756719000 | 6.821229000  | 0.296294000  |
| H  | -3.830989000 | 7.708685000  | -0.325519000 |
| C  | -4.090392000 | 6.867526000  | 1.652520000  |
| H  | -4.430109000 | 7.787380000  | 2.119366000  |
| C  | -3.984470000 | 5.712550000  | 2.413442000  |
| H  | -4.237198000 | 5.703167000  | 3.467917000  |
| N  | -3.569873000 | 4.534237000  | 1.901482000  |
| N  | -3.866064000 | 3.321538000  | 4.790847000  |
| C  | -5.135876000 | 3.320250000  | 5.269484000  |
| H  | -5.894357000 | 3.002527000  | 4.564472000  |
| C  | -5.454305000 | 3.693697000  | 6.564835000  |
| H  | -6.491169000 | 3.668650000  | 6.886809000  |
| C  | -4.433330000 | 4.095261000  | 7.430677000  |
| H  | -4.650256000 | 4.394680000  | 8.451906000  |
| C  | -3.129404000 | 4.103387000  | 6.954612000  |
| H  | -2.318270000 | 4.411256000  | 7.604174000  |
| C  | -2.859482000 | 3.715335000  | 5.638308000  |
| C  | -1.515520000 | 3.689255000  | 5.055958000  |
| N  | -1.469395000 | 3.286133000  | 3.756492000  |
| H  | -4.891517000 | 2.436421000  | 2.544917000  |
| C  | -0.279349000 | 3.225717000  | 3.131592000  |
| C  | -0.345642000 | 4.037399000  | 5.742991000  |
| C  | 0.914773000  | 3.558408000  | 3.756602000  |
| C  | 0.879340000  | 3.972091000  | 5.090792000  |
| H  | -0.302694000 | 2.897389000  | 2.096928000  |
| H  | -0.390011000 | 4.354601000  | 6.778177000  |
| H  | 1.850614000  | 3.492913000  | 3.209299000  |
| H  | 1.793500000  | 4.238968000  | 5.614125000  |

5. [Ru<sup>II</sup>(terpy)(ampy)(H<sub>2</sub>O)]<sup>2+</sup>

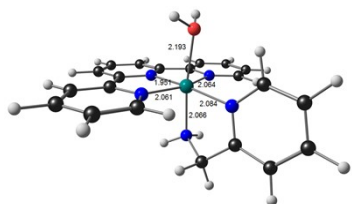

|    |              |              |              |
|----|--------------|--------------|--------------|
| Ru | -3.497521000 | 2.881454000  | 2.879224000  |
| N  | -2.934430000 | 0.931543000  | 3.240238000  |
| C  | -3.015474000 | 0.238341000  | 4.396495000  |
| H  | -3.413321000 | 0.784669000  | 5.245492000  |
| C  | -2.618569000 | -1.089041000 | 4.507984000  |
| H  | -2.706403000 | -1.597939000 | 5.463522000  |
| C  | -2.116131000 | -1.741805000 | 3.381884000  |
| H  | -1.798234000 | -2.779400000 | 3.436362000  |
| C  | -2.031054000 | -1.042389000 | 2.180720000  |
| H  | -1.648423000 | -1.530781000 | 1.291044000  |
| C  | -2.442561000 | 0.289530000  | 2.120526000  |
| C  | -2.401058000 | 1.112501000  | 0.903316000  |
| C  | -1.914115000 | 0.746594000  | -0.353043000 |
| H  | -1.506945000 | -0.244118000 | -0.521816000 |
| C  | -1.951061000 | 1.676850000  | -1.392949000 |
| H  | -1.571991000 | 1.406814000  | -2.374528000 |
| C  | -2.467925000 | 2.955286000  | -1.175576000 |
| H  | -2.490598000 | 3.678471000  | -1.983058000 |
| C  | -2.946879000 | 3.288344000  | 0.092375000  |
| N  | -2.904100000 | 2.364917000  | 1.094150000  |
| C  | -3.510772000 | 4.575806000  | 0.525563000  |
| C  | -3.687556000 | 5.676321000  | -0.312885000 |
| H  | -3.402892000 | 5.611415000  | -1.357458000 |
| C  | -4.230246000 | 6.855311000  | 0.193360000  |
| H  | -4.371614000 | 7.716252000  | -0.454229000 |
| C  | -4.587620000 | 6.909784000  | 1.540119000  |
| H  | -5.013302000 | 7.809036000  | 1.975837000  |
| C  | -4.391047000 | 5.785710000  | 2.335396000  |
| H  | -4.655156000 | 5.783842000  | 3.387545000  |
| N  | -3.868816000 | 4.636149000  | 1.858135000  |
| N  | -3.938426000 | 3.515175000  | 4.814893000  |
| C  | -5.168494000 | 3.724356000  | 5.336308000  |
| H  | -6.004955000 | 3.469745000  | 4.694897000  |
| C  | -5.358456000 | 4.231141000  | 6.615802000  |
| H  | -6.367842000 | 4.374616000  | 6.990290000  |
| C  | -4.244750000 | 4.555266000  | 7.390238000  |
| H  | -4.362087000 | 4.963173000  | 8.390312000  |
| C  | -2.972382000 | 4.346616000  | 6.855733000  |
| H  | -2.080188000 | 4.588407000  | 7.426388000  |
| C  | -2.852516000 | 3.818628000  | 5.576593000  |

|   |              |             |             |
|---|--------------|-------------|-------------|
| C | -1.528639000 | 3.489298000 | 4.945789000 |
| H | -1.267669000 | 2.448859000 | 5.166615000 |
| H | -0.728404000 | 4.131945000 | 5.325257000 |
| N | -1.647241000 | 3.596349000 | 3.456259000 |
| H | -0.866688000 | 3.101712000 | 3.023152000 |
| H | -1.556901000 | 4.574863000 | 3.176708000 |
| O | -5.568033000 | 2.237836000 | 2.550767000 |
| H | -5.984227000 | 2.588045000 | 1.748576000 |
| H | -5.691189000 | 1.277123000 | 2.512158000 |

6.  $[\text{Ru}^{\text{II}}(\text{terpy})(\text{ampy})(\text{H}_2\text{O})]^{2+} \bullet \text{HCOO}^-$

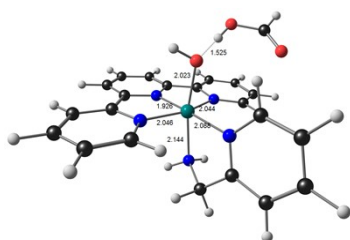

|    |              |              |              |
|----|--------------|--------------|--------------|
| Ru | -3.414469000 | 2.773594000  | 2.897082000  |
| N  | -2.758522000 | 0.875253000  | 3.285569000  |
| C  | -2.742552000 | 0.220322000  | 4.467821000  |
| H  | -3.150892000 | 0.767549000  | 5.310530000  |
| C  | -2.246031000 | -1.067565000 | 4.609831000  |
| H  | -2.254105000 | -1.541658000 | 5.586912000  |
| C  | -1.749190000 | -1.731271000 | 3.485248000  |
| H  | -1.350817000 | -2.738775000 | 3.564841000  |
| C  | -1.778257000 | -1.080852000 | 2.256951000  |
| H  | -1.405277000 | -1.574772000 | 1.366360000  |
| C  | -2.284736000 | 0.217794000  | 2.165706000  |
| C  | -2.354604000 | 0.995639000  | 0.929029000  |
| C  | -1.978235000 | 0.593087000  | -0.351485000 |
| H  | -1.574074000 | -0.399230000 | -0.518520000 |
| C  | -2.136694000 | 1.478019000  | -1.419345000 |
| H  | -1.847835000 | 1.176033000  | -2.421421000 |
| C  | -2.675727000 | 2.746874000  | -1.201702000 |
| H  | -2.813365000 | 3.431492000  | -2.031034000 |
| C  | -3.043656000 | 3.123827000  | 0.089244000  |
| N  | -2.860288000 | 2.251934000  | 1.127909000  |
| C  | -3.608634000 | 4.399902000  | 0.521887000  |
| C  | -3.902528000 | 5.463430000  | -0.329801000 |
| H  | -3.740996000 | 5.358252000  | -1.396880000 |
| C  | -4.411108000 | 6.647857000  | 0.192298000  |
| H  | -4.656988000 | 7.476112000  | -0.465908000 |
| C  | -4.607527000 | 6.748035000  | 1.569727000  |
| H  | -5.015726000 | 7.647437000  | 2.020225000  |
| C  | -4.316328000 | 5.655763000  | 2.374571000  |
| H  | -4.518818000 | 5.668696000  | 3.437451000  |
| N  | -3.838580000 | 4.496044000  | 1.880711000  |



|   |              |             |             |
|---|--------------|-------------|-------------|
| N | -3.913109000 | 3.365753000 | 4.836295000 |
| C | -5.175280000 | 3.452700000 | 5.309659000 |
| H | -5.953626000 | 3.186239000 | 4.606809000 |
| C | -5.444565000 | 3.882490000 | 6.603409000 |
| H | -6.475731000 | 3.935713000 | 6.939389000 |
| C | -4.390149000 | 4.253445000 | 7.435061000 |
| H | -4.574523000 | 4.604498000 | 8.446619000 |
| C | -3.086756000 | 4.174713000 | 6.941381000 |
| H | -2.236481000 | 4.460087000 | 7.554502000 |
| C | -2.881797000 | 3.718489000 | 5.646642000 |
| C | -1.511751000 | 3.518428000 | 5.056044000 |
| H | -1.177098000 | 2.495802000 | 5.262611000 |
| H | -0.786153000 | 4.209494000 | 5.498460000 |
| N | -1.580358000 | 3.654206000 | 3.574266000 |
| H | -0.743741000 | 3.250231000 | 3.156987000 |
| H | -1.587013000 | 4.641693000 | 3.317605000 |
| O | -5.312699000 | 2.134936000 | 2.614438000 |
| H | -6.259187000 | 3.027400000 | 1.818698000 |
| H | -5.347606000 | 1.200894000 | 2.374531000 |
| C | -7.340624000 | 4.625546000 | 2.032637000 |
| O | -6.899269000 | 3.631797000 | 1.276904000 |
| O | -7.023609000 | 4.861681000 | 3.186347000 |
| H | -8.051512000 | 5.257980000 | 1.467474000 |

### 7. [Ru<sup>II</sup>(terpy)(ampy)(HCOO)]<sup>+</sup>

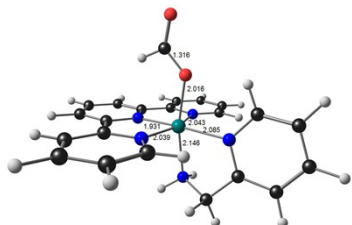

|    |              |              |              |
|----|--------------|--------------|--------------|
| Ru | -3.469255000 | 2.955796000  | 2.917614000  |
| N  | -2.937911000 | 1.016349000  | 3.255255000  |
| C  | -2.999647000 | 0.328540000  | 4.415807000  |
| H  | -3.356441000 | 0.888146000  | 5.273571000  |
| C  | -2.651535000 | -1.010502000 | 4.515637000  |
| H  | -2.725945000 | -1.514314000 | 5.474943000  |
| C  | -2.226978000 | -1.688244000 | 3.369834000  |
| H  | -1.956257000 | -2.739142000 | 3.414516000  |
| C  | -2.170900000 | -0.997629000 | 2.164296000  |
| H  | -1.859218000 | -1.503426000 | 1.257151000  |
| C  | -2.530869000 | 0.350662000  | 2.115654000  |
| C  | -2.535014000 | 1.164302000  | 0.900194000  |
| C  | -2.214695000 | 0.764665000  | -0.396290000 |
| H  | -1.897566000 | -0.253264000 | -0.593288000 |
| C  | -2.328622000 | 1.682085000  | -1.442273000 |
| H  | -2.095753000 | 1.376723000  | -2.457863000 |
| C  | -2.753087000 | 2.988359000  | -1.188391000 |

|   |              |             |              |
|---|--------------|-------------|--------------|
| H | -2.854818000 | 3.698442000 | -2.001377000 |
| C | -3.065509000 | 3.361738000 | 0.117143000  |
| N | -2.955112000 | 2.446005000 | 1.127888000  |
| C | -3.566372000 | 4.654374000 | 0.585643000  |
| C | -3.784419000 | 5.763212000 | -0.233425000 |
| H | -3.576455000 | 5.695456000 | -1.295560000 |
| C | -4.276354000 | 6.944360000 | 0.312445000  |
| H | -4.454010000 | 7.809659000 | -0.319827000 |
| C | -4.544845000 | 6.993846000 | 1.682067000  |
| H | -4.938408000 | 7.892145000 | 2.148886000  |
| C | -4.314217000 | 5.863727000 | 2.454385000  |
| H | -4.527465000 | 5.851068000 | 3.517606000  |
| N | -3.832521000 | 4.712447000 | 1.939536000  |
| N | -3.913130000 | 3.557129000 | 4.863573000  |
| C | -5.162007000 | 3.726228000 | 5.354183000  |
| H | -5.963099000 | 3.445122000 | 4.677600000  |
| C | -5.388829000 | 4.215507000 | 6.634962000  |
| H | -6.409661000 | 4.331191000 | 6.987465000  |
| C | -4.302276000 | 4.553612000 | 7.441377000  |
| H | -4.451668000 | 4.949022000 | 8.442280000  |
| C | -3.013104000 | 4.373702000 | 6.937120000  |
| H | -2.138623000 | 4.620431000 | 7.532733000  |
| C | -2.852224000 | 3.864631000 | 5.655202000  |
| C | -1.505681000 | 3.554122000 | 5.058358000  |
| H | -1.261462000 | 2.504843000 | 5.259299000  |
| H | -0.722035000 | 4.177951000 | 5.501201000  |
| N | -1.567819000 | 3.700210000 | 3.576962000  |
| H | -0.771422000 | 3.224939000 | 3.155754000  |
| H | -1.489001000 | 4.684920000 | 3.322405000  |
| O | -5.400201000 | 2.411913000 | 2.715665000  |
| C | -5.986676000 | 1.962951000 | 1.626320000  |
| O | -7.170785000 | 1.703116000 | 1.547172000  |
| H | -5.308936000 | 1.827918000 | 0.756480000  |

### 8. Ru<sup>II</sup> (terpy) (ampy) (H) ]<sup>+</sup>

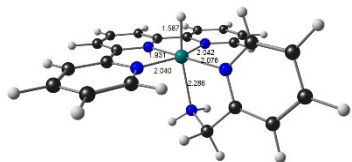

|    |              |              |             |
|----|--------------|--------------|-------------|
| Ru | -3.374017000 | 2.884867000  | 2.825233000 |
| N  | -2.831356000 | 0.951436000  | 3.181553000 |
| C  | -2.846367000 | 0.283172000  | 4.357489000 |
| H  | -3.209459000 | 0.846996000  | 5.209827000 |
| C  | -2.446527000 | -1.038795000 | 4.481343000 |
| H  | -2.484681000 | -1.521568000 | 5.453550000 |
| C  | -2.011322000 | -1.726518000 | 3.344999000 |
| H  | -1.696560000 | -2.764103000 | 3.408834000 |
| C  | -1.993317000 | -1.057740000 | 2.126573000 |

|   |              |              |              |
|---|--------------|--------------|--------------|
| H | -1.664285000 | -1.566503000 | 1.227159000  |
| C | -2.402613000 | 0.275119000  | 2.053923000  |
| C | -2.426593000 | 1.067935000  | 0.826910000  |
| C | -2.064726000 | 0.663211000  | -0.457347000 |
| H | -1.714398000 | -0.347624000 | -0.634365000 |
| C | -2.159233000 | 1.570368000  | -1.513751000 |
| H | -1.880877000 | 1.265463000  | -2.517985000 |
| C | -2.614861000 | 2.869002000  | -1.279903000 |
| H | -2.692280000 | 3.576876000  | -2.097621000 |
| C | -2.973908000 | 3.245345000  | 0.013377000  |
| N | -2.871176000 | 2.345316000  | 1.040605000  |
| C | -3.478107000 | 4.542485000  | 0.458280000  |
| C | -3.684577000 | 5.640574000  | -0.378510000 |
| H | -3.462167000 | 5.556698000  | -1.436695000 |
| C | -4.176029000 | 6.831642000  | 0.143567000  |
| H | -4.342717000 | 7.688699000  | -0.502537000 |
| C | -4.448334000 | 6.902475000  | 1.512200000  |
| H | -4.832429000 | 7.811760000  | 1.965560000  |
| C | -4.225757000 | 5.784535000  | 2.302933000  |
| H | -4.435545000 | 5.794667000  | 3.367036000  |
| N | -3.754892000 | 4.616159000  | 1.811052000  |
| N | -3.908609000 | 3.488606000  | 4.738020000  |
| C | -5.189381000 | 3.655940000  | 5.155430000  |
| H | -5.951544000 | 3.398940000  | 4.429172000  |
| C | -5.512588000 | 4.124058000  | 6.421151000  |
| H | -6.557322000 | 4.232997000  | 6.697500000  |
| C | -4.489809000 | 4.450453000  | 7.311616000  |
| H | -4.711607000 | 4.827364000  | 8.305819000  |
| C | -3.170751000 | 4.283563000  | 6.890678000  |
| H | -2.339924000 | 4.526802000  | 7.547315000  |
| C | -2.911483000 | 3.796064000  | 5.615753000  |
| C | -1.511372000 | 3.523875000  | 5.131664000  |
| H | -1.277919000 | 2.467032000  | 5.307686000  |
| H | -0.788642000 | 4.125352000  | 5.695365000  |
| N | -1.428982000 | 3.738602000  | 3.670661000  |
| H | -0.576332000 | 3.320495000  | 3.306458000  |
| H | -1.388450000 | 4.734168000  | 3.459781000  |
| H | -4.856552000 | 2.395390000  | 2.541687000  |

9.  $[\text{Ru}^{\text{II}}(\text{terpy})(\text{en})(\text{H}_2\text{O})]^{2+}$

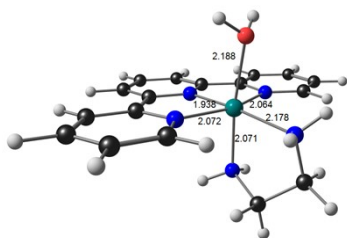

|    |              |             |             |
|----|--------------|-------------|-------------|
| Ru | -3.431406000 | 2.702861000 | 2.867896000 |
|----|--------------|-------------|-------------|

|   |              |              |              |
|---|--------------|--------------|--------------|
| N | -2.789801000 | 0.769353000  | 3.243812000  |
| C | -2.815399000 | 0.066224000  | 4.396590000  |
| H | -3.225670000 | 0.574316000  | 5.262772000  |
| C | -2.352550000 | -1.239565000 | 4.505945000  |
| H | -2.407051000 | -1.751265000 | 5.462526000  |
| C | -1.826945000 | -1.864611000 | 3.375273000  |
| H | -1.455009000 | -2.884272000 | 3.424809000  |
| C | -1.798565000 | -1.161242000 | 2.174494000  |
| H | -1.404693000 | -1.629339000 | 1.278966000  |
| C | -2.285734000 | 0.145428000  | 2.118194000  |
| C | -2.325281000 | 0.952300000  | 0.892207000  |
| C | -1.872583000 | 0.586063000  | -0.376572000 |
| H | -1.432694000 | -0.390442000 | -0.545143000 |
| C | -1.990237000 | 1.492913000  | -1.430370000 |
| H | -1.641014000 | 1.219880000  | -2.422147000 |
| C | -2.553676000 | 2.750995000  | -1.212606000 |
| H | -2.640283000 | 3.458135000  | -2.029911000 |
| C | -2.999404000 | 3.085578000  | 0.066835000  |
| N | -2.880892000 | 2.183422000  | 1.084141000  |
| C | -3.608363000 | 4.351485000  | 0.493915000  |
| C | -3.874059000 | 5.418819000  | -0.365074000 |
| H | -3.615756000 | 5.343506000  | -1.415754000 |
| C | -4.478355000 | 6.573378000  | 0.124869000  |
| H | -4.691202000 | 7.407049000  | -0.538812000 |
| C | -4.805292000 | 6.637354000  | 1.479160000  |
| H | -5.280402000 | 7.515872000  | 1.905839000  |
| C | -4.510086000 | 5.550355000  | 2.293394000  |
| H | -4.751816000 | 5.571089000  | 3.350436000  |
| N | -3.923253000 | 4.421973000  | 1.837948000  |
| N | -3.851084000 | 3.374530000  | 4.897129000  |
| C | -2.706972000 | 4.234229000  | 5.329089000  |
| C | -1.425706000 | 3.607038000  | 4.811346000  |
| H | -1.286286000 | 2.610074000  | 5.237740000  |
| H | -0.555206000 | 4.221289000  | 5.062828000  |
| N | -1.553033000 | 3.444138000  | 3.327054000  |
| H | -0.800506000 | 2.842912000  | 2.987686000  |
| H | -1.415306000 | 4.351029000  | 2.876791000  |
| O | -5.506481000 | 2.029046000  | 2.698215000  |
| H | -6.033196000 | 2.445070000  | 1.998969000  |
| H | -5.637215000 | 1.074497000  | 2.592888000  |
| H | -2.668899000 | 4.346699000  | 6.417180000  |
| H | -2.845273000 | 5.224456000  | 4.885529000  |
| H | -3.939847000 | 2.597541000  | 5.551056000  |
| H | -4.722465000 | 3.894909000  | 4.995089000  |

10.  $[\text{Ru}^{\text{II}}(\text{terpy})(\text{en})(\text{H}_2\text{O})]^{2+} \bullet \text{HCOO}^-$

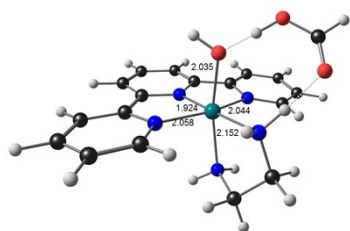

|    |              |              |              |
|----|--------------|--------------|--------------|
| Ru | -3.462064000 | 2.720558000  | 2.793789000  |
| N  | -2.779350000 | 0.823699000  | 3.208563000  |
| C  | -2.779983000 | 0.150093000  | 4.379678000  |
| H  | -3.250926000 | 0.650732000  | 5.217769000  |
| C  | -2.222388000 | -1.110389000 | 4.537659000  |
| H  | -2.253817000 | -1.594214000 | 5.509415000  |
| C  | -1.632965000 | -1.732195000 | 3.435274000  |
| H  | -1.181626000 | -2.716047000 | 3.524983000  |
| C  | -1.638692000 | -1.067249000 | 2.215178000  |
| H  | -1.193301000 | -1.526473000 | 1.339489000  |
| C  | -2.215511000 | 0.200030000  | 2.110270000  |
| C  | -2.272170000 | 0.972790000  | 0.870972000  |
| C  | -1.866282000 | 0.569192000  | -0.400311000 |
| H  | -1.438020000 | -0.415029000 | -0.553192000 |
| C  | -2.034035000 | 1.437734000  | -1.479961000 |
| H  | -1.727779000 | 1.131929000  | -2.475791000 |
| C  | -2.608578000 | 2.692618000  | -1.281621000 |
| H  | -2.754263000 | 3.365387000  | -2.119193000 |
| C  | -2.998252000 | 3.073796000  | 0.002137000  |
| N  | -2.813999000 | 2.216412000  | 1.053986000  |
| C  | -3.568687000 | 4.349736000  | 0.417641000  |
| C  | -3.828111000 | 5.411801000  | -0.448889000 |
| H  | -3.660225000 | 5.287636000  | -1.512930000 |
| C  | -4.304477000 | 6.617540000  | 0.050572000  |
| H  | -4.528022000 | 7.442470000  | -0.619510000 |
| C  | -4.484797000 | 6.743975000  | 1.428547000  |
| H  | -4.848873000 | 7.666435000  | 1.870796000  |
| C  | -4.227678000 | 5.654319000  | 2.246076000  |
| H  | -4.427440000 | 5.703252000  | 3.305476000  |
| N  | -3.812133000 | 4.458177000  | 1.775861000  |
| N  | -4.244228000 | 3.266262000  | 4.722497000  |
| C  | -3.258271000 | 4.078621000  | 5.468321000  |
| C  | -1.855423000 | 3.590456000  | 5.135838000  |
| H  | -1.719414000 | 2.563303000  | 5.482715000  |
| H  | -1.098433000 | 4.222796000  | 5.613482000  |
| N  | -1.695615000 | 3.575394000  | 3.650548000  |
| H  | -0.840478000 | 3.078279000  | 3.404819000  |
| H  | -1.582384000 | 4.531055000  | 3.310770000  |
| O  | -5.356437000 | 2.054916000  | 2.463173000  |
| H  | -6.313969000 | 3.081980000  | 2.199505000  |
| H  | -5.402000000 | 1.327690000  | 1.830341000  |
| C  | -7.147609000 | 4.736269000  | 2.910060000  |
| O  | -7.038878000 | 3.831085000  | 1.975157000  |

|   |              |             |             |
|---|--------------|-------------|-------------|
| O | -6.497274000 | 4.822306000 | 3.952227000 |
| H | -7.919716000 | 5.487234000 | 2.662942000 |
| H | -4.500264000 | 2.436079000 | 5.251685000 |
| H | -5.121625000 | 3.786912000 | 4.558978000 |
| H | -3.423630000 | 4.043698000 | 6.551086000 |
| H | -3.369665000 | 5.119048000 | 5.151141000 |

### 11. [Ru<sup>II</sup>(terpy)(en)(HCOO)]<sup>+</sup>

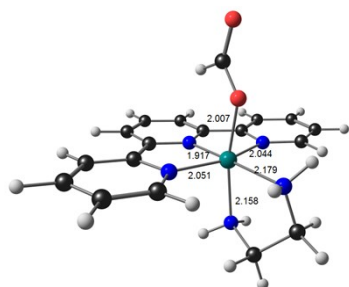

|    |              |              |              |
|----|--------------|--------------|--------------|
| Ru | -3.410100000 | 2.954853000  | 2.774660000  |
| N  | -2.837945000 | 1.000795000  | 3.022678000  |
| C  | -2.797615000 | 0.260972000  | 4.151585000  |
| H  | -3.069516000 | 0.769502000  | 5.069724000  |
| C  | -2.449491000 | -1.081305000 | 4.174118000  |
| H  | -2.447947000 | -1.620676000 | 5.116896000  |
| C  | -2.121286000 | -1.713956000 | 2.972803000  |
| H  | -1.850717000 | -2.765682000 | 2.953612000  |
| C  | -2.159686000 | -0.973327000 | 1.797603000  |
| H  | -1.921392000 | -1.441041000 | 0.848781000  |
| C  | -2.522209000 | 0.375024000  | 1.830339000  |
| C  | -2.627629000 | 1.225900000  | 0.648492000  |
| C  | -2.400245000 | 0.870025000  | -0.680159000 |
| H  | -2.086902000 | -0.137410000 | -0.929914000 |
| C  | -2.594054000 | 1.815657000  | -1.687224000 |
| H  | -2.426430000 | 1.545350000  | -2.725251000 |
| C  | -3.016073000 | 3.106234000  | -1.361673000 |
| H  | -3.182512000 | 3.839908000  | -2.142349000 |
| C  | -3.242343000 | 3.436012000  | -0.028006000 |
| N  | -3.040770000 | 2.496713000  | 0.950472000  |
| C  | -3.749145000 | 4.698089000  | 0.504238000  |
| C  | -4.099553000 | 5.798932000  | -0.279986000 |
| H  | -3.977110000 | 5.750964000  | -1.356270000 |
| C  | -4.617244000 | 6.942981000  | 0.316481000  |
| H  | -4.899642000 | 7.800116000  | -0.287725000 |
| C  | -4.782733000 | 6.960549000  | 1.702922000  |
| H  | -5.199112000 | 7.824448000  | 2.212673000  |
| C  | -4.421114000 | 5.839933000  | 2.435644000  |
| H  | -4.559782000 | 5.816362000  | 3.510502000  |
| N  | -3.905002000 | 4.723579000  | 1.877674000  |
| N  | -3.764384000 | 3.512682000  | 4.851047000  |
| C  | -2.621686000 | 4.323866000  | 5.340794000  |

|   |              |             |             |
|---|--------------|-------------|-------------|
| C | -1.337638000 | 3.726904000 | 4.783811000 |
| H | -1.218601000 | 2.698493000 | 5.136420000 |
| H | -0.468244000 | 4.309305000 | 5.109386000 |
| N | -1.444205000 | 3.675389000 | 3.297079000 |
| H | -0.696726000 | 3.093205000 | 2.921389000 |
| H | -1.303230000 | 4.609562000 | 2.912400000 |
| O | -5.346277000 | 2.425880000 | 2.784495000 |
| C | -6.076655000 | 2.119278000 | 1.732607000 |
| O | -7.274422000 | 1.929683000 | 1.767262000 |
| H | -5.503890000 | 2.034310000 | 0.783330000 |
| H | -2.746140000 | 5.342963000 | 4.962745000 |
| H | -2.578439000 | 4.368503000 | 6.434821000 |
| H | -4.644096000 | 4.020677000 | 4.928277000 |
| H | -3.884941000 | 2.688977000 | 5.437346000 |

## 12. Ru<sup>II</sup> (terpy) (en) (H) ]<sup>+</sup>

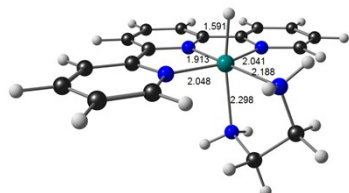

|    |              |              |              |
|----|--------------|--------------|--------------|
| Ru | -3.700255000 | 2.988358000  | 2.402981000  |
| N  | -3.681892000 | 0.941816000  | 2.472480000  |
| C  | -4.219953000 | 0.107195000  | 3.391229000  |
| H  | -4.737628000 | 0.578523000  | 4.219458000  |
| C  | -4.146659000 | -1.274860000 | 3.312127000  |
| H  | -4.609472000 | -1.882440000 | 4.084399000  |
| C  | -3.478199000 | -1.856486000 | 2.231783000  |
| H  | -3.401873000 | -2.935729000 | 2.138506000  |
| C  | -2.911419000 | -1.021895000 | 1.276614000  |
| H  | -2.386241000 | -1.442116000 | 0.425964000  |
| C  | -3.020062000 | 0.365189000  | 1.400350000  |
| C  | -2.482364000 | 1.318883000  | 0.437220000  |
| C  | -1.779404000 | 1.040365000  | -0.733481000 |
| H  | -1.566008000 | 0.014014000  | -1.010643000 |
| C  | -1.350847000 | 2.090704000  | -1.546186000 |
| H  | -0.803628000 | 1.883417000  | -2.460584000 |
| C  | -1.630390000 | 3.408164000  | -1.182269000 |
| H  | -1.302530000 | 4.229540000  | -1.809610000 |
| C  | -2.336608000 | 3.661037000  | -0.008217000 |
| N  | -2.747929000 | 2.619249000  | 0.785930000  |
| C  | -2.732460000 | 4.957299000  | 0.528516000  |
| C  | -2.464403000 | 6.179948000  | -0.090718000 |
| H  | -1.919591000 | 6.195631000  | -1.028239000 |
| C  | -2.896448000 | 7.366657000  | 0.487938000  |
| H  | -2.694636000 | 8.320492000  | 0.009471000  |
| C  | -3.599812000 | 7.303091000  | 1.693751000  |
| H  | -3.964364000 | 8.201158000  | 2.184064000  |

|   |              |             |             |
|---|--------------|-------------|-------------|
| C | -3.843435000 | 6.063763000 | 2.265792000 |
| H | -4.398024000 | 5.986314000 | 3.194366000 |
| N | -3.428496000 | 4.894686000 | 1.725233000 |
| N | -4.784493000 | 3.427615000 | 4.252529000 |
| C | -3.851974000 | 3.878005000 | 5.323204000 |
| C | -2.595231000 | 3.022815000 | 5.278768000 |
| H | -2.855016000 | 1.971446000 | 5.436220000 |
| H | -1.907976000 | 3.329047000 | 6.077017000 |
| N | -1.991199000 | 3.136944000 | 3.931783000 |
| H | -1.280236000 | 2.420157000 | 3.804012000 |
| H | -1.522392000 | 4.036016000 | 3.835628000 |
| H | -5.092803000 | 2.947629000 | 1.635146000 |
| H | -3.589739000 | 4.920578000 | 5.119190000 |
| H | -4.312983000 | 3.829370000 | 6.316526000 |
| H | -5.495482000 | 4.138492000 | 4.092386000 |
| H | -5.297034000 | 2.611019000 | 4.580020000 |

### 13. [Ru<sup>II</sup>(terpy)(bipy)(EtOH)]<sup>2+</sup>

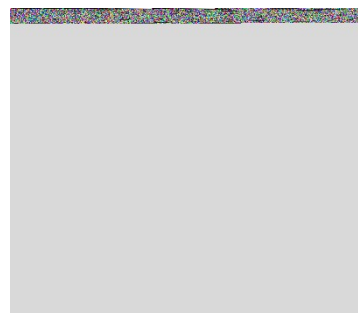

|    |              |              |              |
|----|--------------|--------------|--------------|
| Ru | -3.389428000 | 2.733742000  | 2.925591000  |
| N  | -2.890546000 | 0.765782000  | 3.252595000  |
| C  | -2.989763000 | 0.071858000  | 4.402278000  |
| H  | -3.369911000 | 0.621980000  | 5.256059000  |
| C  | -2.631045000 | -1.267798000 | 4.501826000  |
| H  | -2.731344000 | -1.782123000 | 5.452911000  |
| C  | -2.145275000 | -1.922642000 | 3.370613000  |
| H  | -1.855769000 | -2.968797000 | 3.415470000  |
| C  | -2.034719000 | -1.213793000 | 2.177029000  |
| H  | -1.659879000 | -1.701934000 | 1.284214000  |
| C  | -2.409548000 | 0.128133000  | 2.131081000  |
| C  | -2.348230000 | 0.961177000  | 0.923404000  |
| C  | -1.871080000 | 0.598938000  | -0.336165000 |
| H  | -1.488694000 | -0.399330000 | -0.516929000 |
| C  | -1.884059000 | 1.543101000  | -1.364879000 |
| H  | -1.510551000 | 1.276073000  | -2.349248000 |
| C  | -2.372181000 | 2.829739000  | -1.132563000 |
| H  | -2.379658000 | 3.563247000  | -1.931036000 |
| C  | -2.842988000 | 3.157016000  | 0.139627000  |
| N  | -2.816147000 | 2.222926000  | 1.129273000  |
| C  | -3.370147000 | 4.450860000  | 0.592256000  |
| C  | -3.514995000 | 5.569741000  | -0.227496000 |
| H  | -3.238357000 | 5.512639000  | -1.274514000 |



|   |              |              |              |
|---|--------------|--------------|--------------|
| C | -4.011665000 | 6.757708000  | 0.302792000  |
| H | -4.125386000 | 7.634511000  | -0.328809000 |
| C | -4.358224000 | 6.801089000  | 1.653018000  |
| H | -4.747215000 | 7.707324000  | 2.107756000  |
| C | -4.199565000 | 5.656660000  | 2.426274000  |
| H | -4.453518000 | 5.645855000  | 3.480662000  |
| N | -3.720264000 | 4.500477000  | 1.924980000  |
| N | -3.844170000 | 3.325826000  | 4.842007000  |
| C | -5.057773000 | 3.255465000  | 5.429769000  |
| H | -5.848905000 | 2.824203000  | 4.827189000  |
| C | -5.289049000 | 3.704734000  | 6.722394000  |
| H | -6.285576000 | 3.626368000  | 7.147004000  |
| C | -4.230163000 | 4.249989000  | 7.450527000  |
| H | -4.379605000 | 4.614146000  | 8.462887000  |
| C | -2.975162000 | 4.318988000  | 6.856309000  |
| H | -2.138400000 | 4.736185000  | 7.404398000  |
| C | -2.798657000 | 3.849527000  | 5.552234000  |
| C | -1.528617000 | 3.864197000  | 4.827050000  |
| N | -1.587320000 | 3.360769000  | 3.552454000  |
| O | -5.462167000 | 2.173676000  | 2.524858000  |
| H | -5.895424000 | 2.880821000  | 2.024808000  |
| C | -0.458993000 | 3.332362000  | 2.809586000  |
| C | -0.323708000 | 4.341284000  | 5.349003000  |
| C | 0.759781000  | 3.793273000  | 3.284395000  |
| C | 0.831819000  | 4.309371000  | 4.577947000  |
| H | -0.550522000 | 2.928262000  | 1.810640000  |
| H | -0.291237000 | 4.737201000  | 6.357030000  |
| H | 1.634725000  | 3.746714000  | 2.642828000  |
| H | 1.771230000  | 4.679499000  | 4.978850000  |
| C | -5.807543000 | 0.909608000  | 1.858692000  |
| H | -5.213106000 | 0.832534000  | 0.943720000  |
| H | -5.488498000 | 0.137995000  | 2.560029000  |
| C | -7.289905000 | 0.849927000  | 1.574915000  |
| H | -7.591229000 | 1.643911000  | 0.880329000  |
| H | -7.527995000 | -0.110035000 | 1.103133000  |
| H | -7.871261000 | 0.937285000  | 2.497651000  |

**14. [Ru<sup>II</sup>(terpy)(bipy)(EtOH)]<sup>2+</sup>•HCOO<sup>-</sup>**

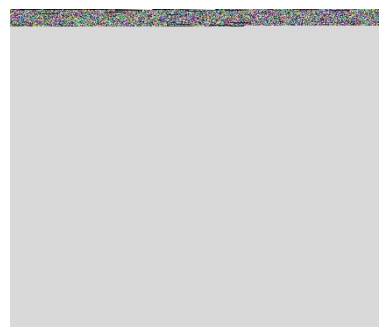

|    |              |             |             |
|----|--------------|-------------|-------------|
| Ru | -3.501302000 | 2.745308000 | 3.039612000 |
|----|--------------|-------------|-------------|

|   |              |              |              |
|---|--------------|--------------|--------------|
| N | -3.135978000 | 0.755445000  | 3.360898000  |
| C | -3.213426000 | 0.083627000  | 4.526204000  |
| H | -3.498815000 | 0.672331000  | 5.390683000  |
| C | -2.960759000 | -1.277206000 | 4.625281000  |
| H | -3.040790000 | -1.770338000 | 5.589300000  |
| C | -2.614765000 | -1.985946000 | 3.473005000  |
| H | -2.416088000 | -3.053149000 | 3.515649000  |
| C | -2.525044000 | -1.302602000 | 2.265694000  |
| H | -2.256713000 | -1.828051000 | 1.355983000  |
| C | -2.782985000 | 0.068262000  | 2.222044000  |
| C | -2.715590000 | 0.885947000  | 1.012326000  |
| C | -2.350789000 | 0.478713000  | -0.267983000 |
| H | -2.090069000 | -0.555606000 | -0.462068000 |
| C | -2.328199000 | 1.417503000  | -1.301128000 |
| H | -2.051004000 | 1.111210000  | -2.305169000 |
| C | -2.664906000 | 2.745544000  | -1.044503000 |
| H | -2.659260000 | 3.475964000  | -1.844889000 |
| C | -3.031931000 | 3.119466000  | 0.245741000  |
| N | -3.050209000 | 2.188923000  | 1.241608000  |
| C | -3.444216000 | 4.442519000  | 0.705985000  |
| C | -3.604230000 | 5.552189000  | -0.123173000 |
| H | -3.391197000 | 5.465802000  | -1.182511000 |
| C | -4.061215000 | 6.751812000  | 0.409008000  |
| H | -4.201013000 | 7.617710000  | -0.231863000 |
| C | -4.348817000 | 6.820445000  | 1.773061000  |
| H | -4.718922000 | 7.734016000  | 2.228093000  |
| C | -4.169902000 | 5.688355000  | 2.554501000  |
| H | -4.395407000 | 5.687859000  | 3.614891000  |
| N | -3.729349000 | 4.522123000  | 2.049265000  |
| N | -3.787432000 | 3.338743000  | 4.989194000  |
| C | -4.978661000 | 3.329659000  | 5.625274000  |
| H | -5.814587000 | 3.018500000  | 5.006022000  |
| C | -5.107018000 | 3.692512000  | 6.957572000  |
| H | -6.087002000 | 3.671640000  | 7.425381000  |
| C | -3.970425000 | 4.079936000  | 7.672598000  |
| H | -4.040178000 | 4.367012000  | 8.717957000  |
| C | -2.743083000 | 4.095784000  | 7.020982000  |
| H | -1.847411000 | 4.393019000  | 7.554318000  |
| C | -2.669103000 | 3.723821000  | 5.675661000  |
| C | -1.438432000 | 3.694592000  | 4.885017000  |
| N | -1.597464000 | 3.247184000  | 3.600278000  |
| O | -5.521497000 | 2.476236000  | 2.847340000  |
| C | -6.027732000 | 1.183286000  | 2.537237000  |
| H | -5.673325000 | 0.872864000  | 1.544814000  |
| H | -5.668585000 | 0.452925000  | 3.274662000  |
| H | -6.143150000 | 3.408464000  | 1.848740000  |
| C | -7.550189000 | 1.198024000  | 2.555026000  |
| H | -7.943464000 | 1.879662000  | 1.797383000  |
| H | -7.930450000 | 0.190294000  | 2.349381000  |
| H | -7.917973000 | 1.516495000  | 3.536962000  |
| C | -6.453301000 | 3.671308000  | -0.053262000 |

|   |              |             |              |
|---|--------------|-------------|--------------|
| O | -6.613631000 | 4.077353000 | 1.196672000  |
| O | -5.842829000 | 2.683305000 | -0.423434000 |
| H | -6.945496000 | 4.369426000 | -0.757800000 |
| C | -0.513318000 | 3.185641000 | 2.796851000  |
| C | -0.181787000 | 4.082915000 | 5.359591000  |
| C | 0.753929000  | 3.558280000 | 3.217340000  |
| C | 0.926776000  | 4.016143000 | 4.525016000  |
| H | -0.687650000 | 2.827392000 | 1.790046000  |
| H | -0.073878000 | 4.438247000 | 6.377650000  |
| H | 1.589120000  | 3.490433000 | 2.526445000  |
| H | 1.906514000  | 4.317303000 | 4.885070000  |

15. [Ru<sup>II</sup>(terpy)(ampy)(EtOH)]<sup>2+</sup>

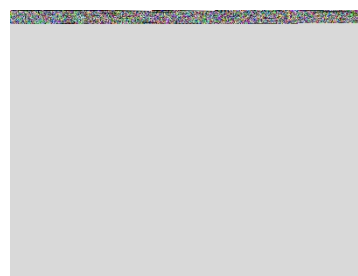

|    |              |              |              |
|----|--------------|--------------|--------------|
| Ru | -3.513742000 | 2.860845000  | 2.985426000  |
| N  | -2.925506000 | 0.924659000  | 3.356780000  |
| C  | -2.960479000 | 0.253769000  | 4.526813000  |
| H  | -3.321911000 | 0.816490000  | 5.381073000  |
| C  | -2.570290000 | -1.074745000 | 4.644314000  |
| H  | -2.621639000 | -1.566677000 | 5.611218000  |
| C  | -2.119614000 | -1.750220000 | 3.509365000  |
| H  | -1.809013000 | -2.789656000 | 3.567379000  |
| C  | -2.078127000 | -1.070678000 | 2.294606000  |
| H  | -1.737877000 | -1.576072000 | 1.397418000  |
| C  | -2.482630000 | 0.262586000  | 2.229927000  |
| C  | -2.500565000 | 1.060688000  | 0.997076000  |
| C  | -2.067400000 | 0.675491000  | -0.272006000 |
| H  | -1.656634000 | -0.313854000 | -0.439137000 |
| C  | -2.160637000 | 1.584409000  | -1.327876000 |
| H  | -1.823077000 | 1.298543000  | -2.319790000 |
| C  | -2.679295000 | 2.861994000  | -1.111797000 |
| H  | -2.744478000 | 3.569877000  | -1.930513000 |
| C  | -3.101977000 | 3.215889000  | 0.170480000  |
| N  | -3.007299000 | 2.312281000  | 1.187068000  |
| C  | -3.634469000 | 4.513386000  | 0.608209000  |
| C  | -3.831904000 | 5.606002000  | -0.236366000 |
| H  | -3.606150000 | 5.519606000  | -1.293567000 |
| C  | -4.313439000 | 6.805883000  | 0.280891000  |
| H  | -4.465757000 | 7.662075000  | -0.370479000 |
| C  | -4.592285000 | 6.888708000  | 1.645067000  |
| H  | -4.966865000 | 7.805804000  | 2.090428000  |
| C  | -4.385093000 | 5.770349000  | 2.444372000  |

|   |              |              |             |
|---|--------------|--------------|-------------|
| H | -4.592104000 | 5.790272000  | 3.508982000 |
| N | -3.918107000 | 4.600403000  | 1.957574000 |
| N | -3.859867000 | 3.555702000  | 4.916420000 |
| C | -5.067046000 | 3.806764000  | 5.471278000 |
| H | -5.926820000 | 3.511841000  | 4.879625000 |
| C | -5.202948000 | 4.401234000  | 6.719298000 |
| H | -6.195203000 | 4.578706000  | 7.123582000 |
| C | -4.057241000 | 4.763896000  | 7.427609000 |
| H | -4.132482000 | 5.239432000  | 8.401568000 |
| C | -2.808320000 | 4.503102000  | 6.861726000 |
| H | -1.892502000 | 4.769449000  | 7.381731000 |
| C | -2.742637000 | 3.891661000  | 5.616601000 |
| C | -1.448090000 | 3.510828000  | 4.954326000 |
| H | -1.200239000 | 2.474219000  | 5.206119000 |
| H | -0.622606000 | 4.149797000  | 5.282451000 |
| N | -1.619118000 | 3.564201000  | 3.468184000 |
| H | -0.865755000 | 3.037753000  | 3.024996000 |
| H | -1.521588000 | 4.529341000  | 3.148677000 |
| O | -5.585251000 | 2.280831000  | 2.757399000 |
| C | -5.967082000 | 0.922734000  | 2.336159000 |
| H | -5.376014000 | 0.662975000  | 1.453031000 |
| H | -5.669145000 | 0.285545000  | 3.169526000 |
| H | -6.023691000 | 2.894070000  | 2.149250000 |
| C | -7.451838000 | 0.856694000  | 2.064193000 |
| H | -7.731027000 | 1.515168000  | 1.232035000 |
| H | -7.720635000 | -0.166846000 | 1.779708000 |
| H | -8.027347000 | 1.132420000  | 2.952992000 |

**16. [Ru<sup>II</sup>(terpy)(ampy)(EtOH)]<sup>2+</sup>•HCOO<sup>-</sup>**

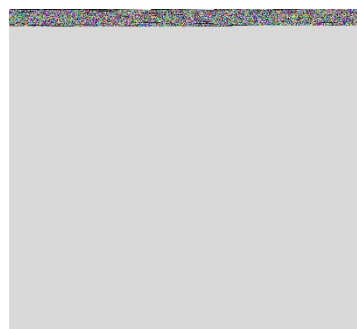

|    |              |              |             |
|----|--------------|--------------|-------------|
| Ru | -3.490700000 | 2.816233000  | 2.968074000 |
| N  | -2.883984000 | 0.904274000  | 3.365017000 |
| C  | -2.867249000 | 0.268303000  | 4.555037000 |
| H  | -3.226431000 | 0.846866000  | 5.399421000 |
| C  | -2.439677000 | -1.044465000 | 4.701421000 |
| H  | -2.449661000 | -1.506411000 | 5.684302000 |
| C  | -2.014917000 | -1.747230000 | 3.572114000 |
| H  | -1.677444000 | -2.776521000 | 3.652473000 |
| C  | -2.036615000 | -1.108310000 | 2.336076000 |
| H  | -1.720771000 | -1.633999000 | 1.441744000 |

|   |              |              |              |
|---|--------------|--------------|--------------|
| C | -2.474896000 | 0.212632000  | 2.241750000  |
| C | -2.567412000 | 0.970595000  | 0.992465000  |
| C | -2.302484000 | 0.519792000  | -0.298862000 |
| H | -1.967795000 | -0.497480000 | -0.468118000 |
| C | -2.495900000 | 1.387404000  | -1.375962000 |
| H | -2.312619000 | 1.041962000  | -2.388843000 |
| C | -2.928890000 | 2.695208000  | -1.154570000 |
| H | -3.089040000 | 3.368308000  | -1.988846000 |
| C | -3.174482000 | 3.122208000  | 0.148869000  |
| N | -3.006957000 | 2.249587000  | 1.186929000  |
| C | -3.614235000 | 4.442593000  | 0.589527000  |
| C | -3.790098000 | 5.538245000  | -0.253851000 |
| H | -3.620942000 | 5.427730000  | -1.318610000 |
| C | -4.204970000 | 6.756159000  | 0.269548000  |
| H | -4.358557000 | 7.610972000  | -0.382568000 |
| C | -4.424877000 | 6.858653000  | 1.645091000  |
| H | -4.755235000 | 7.789192000  | 2.097308000  |
| C | -4.233345000 | 5.741265000  | 2.443112000  |
| H | -4.424248000 | 5.769031000  | 3.509473000  |
| N | -3.842983000 | 4.548181000  | 1.946662000  |
| N | -3.924225000 | 3.515469000  | 4.883377000  |
| C | -5.170578000 | 3.708467000  | 5.370639000  |
| H | -5.976213000 | 3.366592000  | 4.731572000  |
| C | -5.396532000 | 4.305739000  | 6.604301000  |
| H | -6.416774000 | 4.440077000  | 6.951659000  |
| C | -4.310057000 | 4.730565000  | 7.368641000  |
| H | -4.458750000 | 5.212101000  | 8.331123000  |
| C | -3.022209000 | 4.525208000  | 6.870815000  |
| H | -2.147423000 | 4.838031000  | 7.434320000  |
| C | -2.862726000 | 3.907683000  | 5.637469000  |
| C | -1.516101000 | 3.576642000  | 5.052997000  |
| H | -1.254442000 | 2.546778000  | 5.321093000  |
| H | -0.738992000 | 4.239492000  | 5.448421000  |
| N | -1.591735000 | 3.624438000  | 3.566467000  |
| H | -0.791504000 | 3.135550000  | 3.169157000  |
| H | -1.532974000 | 4.591758000  | 3.247301000  |
| O | -5.417298000 | 2.204769000  | 2.792550000  |
| C | -5.775265000 | 1.111419000  | 1.961838000  |
| H | -5.679170000 | 1.401161000  | 0.906230000  |
| H | -5.108888000 | 0.259940000  | 2.149452000  |
| H | -6.275195000 | 3.318495000  | 2.402827000  |
| C | -7.211845000 | 0.702725000  | 2.258642000  |
| H | -7.894858000 | 1.533768000  | 2.061995000  |
| H | -7.498458000 | -0.142572000 | 1.622060000  |
| H | -7.313582000 | 0.405117000  | 3.308253000  |
| C | -7.026601000 | 4.375743000  | 0.936920000  |
| O | -6.932223000 | 4.122884000  | 2.229793000  |
| O | -6.441571000 | 3.789663000  | 0.045332000  |
| H | -7.715952000 | 5.221157000  | 0.745913000  |

17. [Ru<sup>II</sup>(terpy)(en)(EtOH)]<sup>2+</sup>

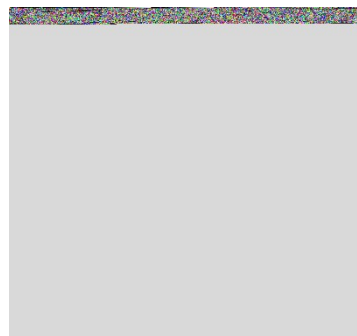

|    |              |              |              |
|----|--------------|--------------|--------------|
| Ru | -3.418924000 | 2.770291000  | 2.847815000  |
| N  | -2.837836000 | 0.815764000  | 3.192185000  |
| C  | -2.883078000 | 0.094197000  | 4.333622000  |
| H  | -3.287354000 | 0.597010000  | 5.205668000  |
| C  | -2.443345000 | -1.220723000 | 4.425161000  |
| H  | -2.507895000 | -1.745416000 | 5.374031000  |
| C  | -1.927451000 | -1.839183000 | 3.286470000  |
| H  | -1.573575000 | -2.865753000 | 3.322200000  |
| C  | -1.879617000 | -1.117798000 | 2.097570000  |
| H  | -1.490358000 | -1.579530000 | 1.196907000  |
| C  | -2.338202000 | 0.199620000  | 2.059501000  |
| C  | -2.344645000 | 1.029934000  | 0.849960000  |
| C  | -1.886252000 | 0.679127000  | -0.421059000 |
| H  | -1.463931000 | -0.302667000 | -0.603412000 |
| C  | -1.975577000 | 1.606937000  | -1.458456000 |
| H  | -1.623358000 | 1.344975000  | -2.451889000 |
| C  | -2.509774000 | 2.874651000  | -1.220294000 |
| H  | -2.568332000 | 3.600380000  | -2.023587000 |
| C  | -2.954242000 | 3.197015000  | 0.061690000  |
| N  | -2.872001000 | 2.270364000  | 1.061354000  |
| C  | -3.536529000 | 4.466854000  | 0.509803000  |
| C  | -3.808296000 | 5.542470000  | -0.335276000 |
| H  | -3.565490000 | 5.474804000  | -1.390043000 |
| C  | -4.402074000 | 6.694541000  | 0.172907000  |
| H  | -4.620132000 | 7.534785000  | -0.480455000 |
| C  | -4.710939000 | 6.747829000  | 1.531961000  |
| H  | -5.175743000 | 7.624845000  | 1.972749000  |
| C  | -4.412689000 | 5.650593000  | 2.330649000  |
| H  | -4.645219000 | 5.659754000  | 3.389654000  |
| N  | -3.841294000 | 4.524259000  | 1.855313000  |
| N  | -3.815513000 | 3.427131000  | 4.889751000  |
| C  | -2.644823000 | 4.245045000  | 5.329712000  |
| C  | -1.382648000 | 3.578758000  | 4.814094000  |
| H  | -1.282595000 | 2.572078000  | 5.228790000  |
| H  | -0.493673000 | 4.158267000  | 5.083346000  |
| N  | -1.505265000 | 3.439219000  | 3.328726000  |
| H  | -0.777327000 | 2.810221000  | 2.986561000  |
| H  | -1.327092000 | 4.344121000  | 2.889179000  |
| O  | -5.483272000 | 2.158035000  | 2.641624000  |
| H  | -5.571884000 | 1.210737000  | 2.823434000  |

|   |              |             |             |
|---|--------------|-------------|-------------|
| H | -2.605949000 | 4.353394000 | 6.418443000 |
| H | -2.747424000 | 5.240835000 | 4.888799000 |
| H | -3.927564000 | 2.647867000 | 5.537228000 |
| H | -4.670814000 | 3.973355000 | 4.989777000 |
| C | -6.230290000 | 2.415368000 | 1.398147000 |
| H | -6.305374000 | 3.501627000 | 1.345813000 |
| H | -5.626308000 | 2.053712000 | 0.560210000 |
| C | -7.585030000 | 1.749550000 | 1.450027000 |
| H | -8.169073000 | 2.112826000 | 2.300940000 |
| H | -7.488116000 | 0.658594000 | 1.514810000 |
| H | -8.132685000 | 1.977986000 | 0.528546000 |

**18. [Ru<sup>II</sup>(terpy)(en)(EtOH)]<sup>2+</sup>•HCOO<sup>-</sup>**

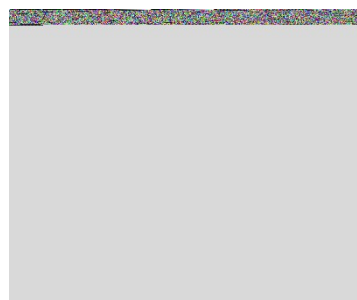

|    |              |              |              |
|----|--------------|--------------|--------------|
| Ru | -3.500762000 | 2.788950000  | 2.867085000  |
| N  | -2.940480000 | 0.861017000  | 3.321327000  |
| C  | -3.004238000 | 0.208803000  | 4.501124000  |
| H  | -3.424085000 | 0.763614000  | 5.332145000  |
| C  | -2.570512000 | -1.098130000 | 4.676014000  |
| H  | -2.647095000 | -1.563787000 | 5.654228000  |
| C  | -2.050594000 | -1.789650000 | 3.580539000  |
| H  | -1.701630000 | -2.813248000 | 3.681727000  |
| C  | -1.995490000 | -1.144155000 | 2.350490000  |
| H  | -1.607663000 | -1.660344000 | 1.479362000  |
| C  | -2.442491000 | 0.172487000  | 2.230258000  |
| C  | -2.443993000 | 0.925603000  | 0.978344000  |
| C  | -2.023802000 | 0.484071000  | -0.274774000 |
| H  | -1.637566000 | -0.521173000 | -0.400957000 |
| C  | -2.110192000 | 1.345383000  | -1.369637000 |
| H  | -1.790486000 | 1.010277000  | -2.351563000 |
| C  | -2.600314000 | 2.640399000  | -1.198808000 |
| H  | -2.659980000 | 3.317301000  | -2.043760000 |
| C  | -3.009417000 | 3.058249000  | 0.066270000  |
| N  | -2.937653000 | 2.194458000  | 1.127400000  |
| C  | -3.504498000 | 4.373867000  | 0.452951000  |
| C  | -3.645711000 | 5.447040000  | -0.427873000 |
| H  | -3.409933000 | 5.312279000  | -1.477737000 |
| C  | -4.088705000 | 6.678356000  | 0.038773000  |
| H  | -4.209545000 | 7.515204000  | -0.642917000 |
| C  | -4.378236000 | 6.811169000  | 1.398144000  |
| H  | -4.736024000 | 7.749511000  | 1.811508000  |

|   |              |              |             |
|---|--------------|--------------|-------------|
| C | -4.226530000 | 5.714572000  | 2.233547000 |
| H | -4.493679000 | 5.774223000  | 3.278895000 |
| N | -3.809653000 | 4.504547000  | 1.797345000 |
| N | -4.024336000 | 3.497519000  | 4.833785000 |
| C | -2.913409000 | 4.305589000  | 5.380683000 |
| C | -1.594025000 | 3.668330000  | 4.972082000 |
| H | -1.514867000 | 2.662750000  | 5.393877000 |
| H | -0.743022000 | 4.263192000  | 5.322875000 |
| N | -1.584699000 | 3.523474000  | 3.486186000 |
| H | -0.812463000 | 2.921524000  | 3.202824000 |
| H | -1.415233000 | 4.433779000  | 3.057567000 |
| O | -5.458047000 | 2.233833000  | 2.767876000 |
| C | -5.851488000 | 1.217729000  | 1.852861000 |
| H | -5.828701000 | 1.607987000  | 0.822512000 |
| H | -5.139369000 | 0.384620000  | 1.903126000 |
| H | -6.333087000 | 3.283090000  | 2.701485000 |
| C | -7.246802000 | 0.715323000  | 2.192845000 |
| H | -7.976638000 | 1.527256000  | 2.131134000 |
| H | -7.538299000 | -0.072907000 | 1.488374000 |
| H | -7.263845000 | 0.303809000  | 3.207964000 |
| C | -7.130687000 | 4.944988000  | 3.532815000 |
| O | -7.099182000 | 4.060775000  | 2.577825000 |
| O | -6.348723000 | 5.058368000  | 4.482646000 |
| H | -7.968196000 | 5.656765000  | 3.414107000 |
| H | -2.966417000 | 4.404442000  | 6.470796000 |
| H | -2.985043000 | 5.309410000  | 4.951844000 |
| H | -4.898844000 | 4.049840000  | 4.771440000 |
| H | -4.231329000 | 2.722125000  | 5.458820000 |

**19. Reaction intermediate 1: [Ru<sup>II</sup>(terpy)(N<sup>^</sup>N)(H)(CO<sub>2</sub>)]<sup>+</sup> ( $\Delta E = 0.32$  eV)**

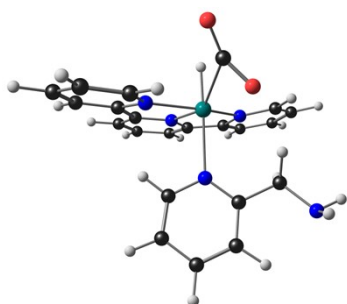

|    |              |              |             |
|----|--------------|--------------|-------------|
| Ru | -3.849495000 | 2.981844000  | 2.535601000 |
| N  | -3.501464000 | 0.940726000  | 2.585809000 |
| C  | -3.765963000 | 0.071976000  | 3.582457000 |
| H  | -4.203364000 | 0.492683000  | 4.479314000 |
| C  | -3.524122000 | -1.291211000 | 3.477904000 |
| H  | -3.773745000 | -1.941748000 | 4.310701000 |
| C  | -2.980915000 | -1.796910000 | 2.297506000 |
| H  | -2.796645000 | -2.860787000 | 2.179447000 |
| C  | -2.670260000 | -0.910119000 | 1.272668000 |
| H  | -2.229534000 | -1.269729000 | 0.349633000 |



|   |              |             |              |
|---|--------------|-------------|--------------|
| C | -2.924705000 | 0.451534000 | 1.434882000  |
| C | -2.579901000 | 1.474786000 | 0.450461000  |
| C | -1.944038000 | 1.294735000 | -0.778943000 |
| H | -1.662289000 | 0.301969000 | -1.110193000 |
| C | -1.671487000 | 2.407693000 | -1.571344000 |
| H | -1.174731000 | 2.282781000 | -2.528794000 |
| C | -2.045995000 | 3.682565000 | -1.143058000 |
| H | -1.851414000 | 4.547591000 | -1.766043000 |
| C | -2.694115000 | 3.829473000 | 0.081644000  |
| N | -2.925351000 | 2.727651000 | 0.854224000  |
| C | -3.281001000 | 5.060215000 | 0.626166000  |
| C | -3.267495000 | 6.291537000 | -0.028394000 |
| H | -2.718898000 | 6.405394000 | -0.956426000 |
| C | -3.981303000 | 7.362753000 | 0.500931000  |
| H | -3.980796000 | 8.324547000 | -0.003773000 |
| C | -4.709521000 | 7.172310000 | 1.674941000  |
| H | -5.300481000 | 7.972561000 | 2.110369000  |
| C | -4.669010000 | 5.932874000 | 2.300224000  |
| H | -5.204485000 | 5.737240000 | 3.221718000  |
| N | -3.953003000 | 4.901642000 | 1.814690000  |
| N | -1.844360000 | 3.304330000 | 3.751496000  |
| C | -0.918814000 | 2.339565000 | 3.575693000  |
| H | -1.161206000 | 1.564239000 | 2.861352000  |
| C | 0.292266000  | 2.294454000 | 4.252973000  |
| H | 0.987087000  | 1.480777000 | 4.066348000  |
| C | 0.574116000  | 3.304645000 | 5.168959000  |
| H | 1.505856000  | 3.307062000 | 5.729382000  |
| C | -0.357279000 | 4.321280000 | 5.342315000  |
| H | -0.182483000 | 5.150439000 | 6.018200000  |
| C | -1.552526000 | 4.304759000 | 4.618942000  |
| C | -2.547567000 | 5.434986000 | 4.762897000  |
| H | -3.551600000 | 5.003012000 | 4.802467000  |
| H | -2.494374000 | 6.025245000 | 3.840934000  |
| N | -2.227387000 | 6.319573000 | 5.880781000  |
| H | -2.495952000 | 5.884543000 | 6.760284000  |
| H | -2.763926000 | 7.178228000 | 5.804737000  |
| O | -5.132409000 | 3.419399000 | 4.267526000  |
| C | -5.609476000 | 2.473426000 | 3.630267000  |
| O | -6.429909000 | 1.620084000 | 3.552100000  |
| H | -5.135655000 | 2.779578000 | 1.653345000  |

20. Reaction intermediate 2:  $[\text{Ru}^{\text{II}}(\text{terpy})(\text{N}^{\wedge}\text{N})(\text{H})(\text{CO}_2)]^+$  ( $\Delta E = 1.00 \text{ eV}$ )

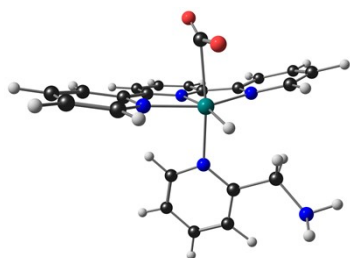

|    |              |              |              |
|----|--------------|--------------|--------------|
| Ru | -3.751403000 | 3.022775000  | 2.861907000  |
| N  | -3.544343000 | 0.978323000  | 2.769232000  |
| C  | -4.045523000 | 0.072398000  | 3.631163000  |
| H  | -4.505291000 | 0.485594000  | 4.522086000  |
| C  | -3.992434000 | -1.298871000 | 3.397108000  |
| H  | -4.424876000 | -1.981798000 | 4.122416000  |
| C  | -3.386381000 | -1.765781000 | 2.231916000  |
| H  | -3.331667000 | -2.829676000 | 2.019222000  |
| C  | -2.860785000 | -0.840168000 | 1.332476000  |
| H  | -2.401026000 | -1.174768000 | 0.409035000  |
| C  | -2.953108000 | 0.523504000  | 1.603640000  |
| C  | -2.488473000 | 1.566314000  | 0.668539000  |
| C  | -1.820733000 | 1.390526000  | -0.547585000 |
| H  | -1.542551000 | 0.404269000  | -0.901016000 |
| C  | -1.531264000 | 2.521800000  | -1.314190000 |
| H  | -1.013366000 | 2.407579000  | -2.262379000 |
| C  | -1.921223000 | 3.795530000  | -0.892495000 |
| H  | -1.719108000 | 4.661254000  | -1.512749000 |
| C  | -2.593990000 | 3.915256000  | 0.327933000  |
| N  | -2.806618000 | 2.811844000  | 1.065477000  |
| C  | -3.244072000 | 5.117647000  | 0.885030000  |
| C  | -3.343204000 | 6.316885000  | 0.179704000  |
| H  | -2.824762000 | 6.429664000  | -0.765801000 |
| C  | -4.148203000 | 7.345633000  | 0.663573000  |
| H  | -4.246287000 | 8.273806000  | 0.107779000  |
| C  | -4.847898000 | 7.145424000  | 1.852786000  |
| H  | -5.514817000 | 7.903467000  | 2.252928000  |
| C  | -4.680245000 | 5.947341000  | 2.538555000  |
| H  | -5.184439000 | 5.752458000  | 3.478075000  |
| N  | -3.886716000 | 4.953194000  | 2.094993000  |
| N  | -1.798183000 | 3.314865000  | 3.689237000  |
| C  | -0.854711000 | 2.387588000  | 3.406455000  |
| H  | -1.137911000 | 1.601679000  | 2.724856000  |
| C  | 0.418479000  | 2.386183000  | 3.952793000  |
| H  | 1.114154000  | 1.597792000  | 3.681577000  |
| C  | 0.758530000  | 3.398221000  | 4.847081000  |
| H  | 1.743914000  | 3.438034000  | 5.303980000  |
| C  | -0.196809000 | 4.363113000  | 5.136803000  |
| H  | 0.002810000  | 5.186074000  | 5.813870000  |
| C  | -1.465443000 | 4.314708000  | 4.552621000  |
| C  | -2.469332000 | 5.396818000  | 4.877144000  |

|   |              |             |             |
|---|--------------|-------------|-------------|
| H | -3.456981000 | 4.919574000 | 4.942393000 |
| H | -2.507656000 | 6.070050000 | 4.014058000 |
| N | -2.085695000 | 6.183520000 | 6.044361000 |
| H | -2.300971000 | 5.674752000 | 6.898309000 |
| H | -2.625156000 | 7.043113000 | 6.069876000 |
| O | -5.875115000 | 2.803300000 | 2.656729000 |
| C | -5.400474000 | 2.691939000 | 1.528813000 |
| O | -5.544339000 | 2.520615000 | 0.361181000 |
| H | -4.216248000 | 3.170523000 | 4.400292000 |

**21. Reaction intermediate 3: [Ru<sup>II</sup>(terpy)(N<sup>^</sup>N)(H)(CO<sub>2</sub>)]<sup>+</sup> ( $\Delta E = 0.44$  eV)**

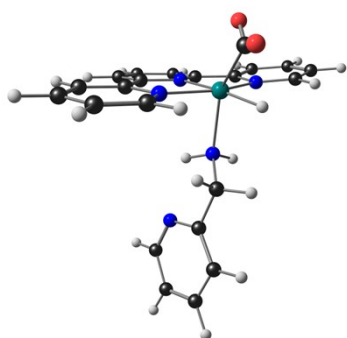

|    |              |              |              |
|----|--------------|--------------|--------------|
| Ru | -3.832433000 | 2.932580000  | 2.644849000  |
| N  | -3.557778000 | 0.894790000  | 2.883352000  |
| C  | -4.032484000 | 0.115655000  | 3.879196000  |
| H  | -4.641560000 | 0.622697000  | 4.618008000  |
| C  | -3.800237000 | -1.252303000 | 3.940796000  |
| H  | -4.220708000 | -1.826593000 | 4.760841000  |
| C  | -3.045832000 | -1.860986000 | 2.938329000  |
| H  | -2.854508000 | -2.930084000 | 2.954803000  |
| C  | -2.542544000 | -1.071005000 | 1.910420000  |
| H  | -1.951004000 | -1.514825000 | 1.117242000  |
| C  | -2.801012000 | 0.299389000  | 1.892550000  |
| C  | -2.296455000 | 1.205603000  | 0.852821000  |
| C  | -1.440279000 | 0.899517000  | -0.209502000 |
| H  | -1.080191000 | -0.111319000 | -0.363318000 |
| C  | -1.036489000 | 1.928050000  | -1.060710000 |
| H  | -0.363294000 | 1.711125000  | -1.885233000 |
| C  | -1.477049000 | 3.238796000  | -0.855219000 |
| H  | -1.149515000 | 4.035199000  | -1.513686000 |
| C  | -2.337348000 | 3.495476000  | 0.212946000  |
| N  | -2.719202000 | 2.478452000  | 1.020858000  |
| C  | -2.948833000 | 4.784927000  | 0.584581000  |
| C  | -2.853059000 | 5.934060000  | -0.197845000 |
| H  | -2.254310000 | 5.920843000  | -1.101787000 |
| C  | -3.547547000 | 7.084127000  | 0.168716000  |
| H  | -3.482855000 | 7.981099000  | -0.440636000 |
| C  | -4.333187000 | 7.056761000  | 1.319082000  |
| H  | -4.902259000 | 7.925218000  | 1.636738000  |

|   |              |             |             |
|---|--------------|-------------|-------------|
| C | -4.380756000 | 5.891764000 | 2.077344000 |
| H | -4.971486000 | 5.823325000 | 2.983724000 |
| N | -3.703165000 | 4.775638000 | 1.740399000 |
| N | 0.312985000  | 2.352591000 | 4.768758000 |
| C | 1.570661000  | 2.187088000 | 5.205228000 |
| H | 2.300824000  | 1.867116000 | 4.462583000 |
| C | 1.957510000  | 2.402982000 | 6.528698000 |
| H | 2.990235000  | 2.252076000 | 6.830133000 |
| C | 0.991400000  | 2.820958000 | 7.443324000 |
| H | 1.252886000  | 3.008292000 | 8.481945000 |
| C | -0.317425000 | 3.003794000 | 7.000937000 |
| H | -1.098511000 | 3.335738000 | 7.680720000 |
| C | -0.607735000 | 2.752705000 | 5.659081000 |
| C | -2.020943000 | 2.875298000 | 5.127771000 |
| H | -2.602136000 | 3.618815000 | 5.675629000 |
| H | -2.533843000 | 1.916075000 | 5.231474000 |
| N | -2.030371000 | 3.228469000 | 3.686269000 |
| H | -1.255791000 | 2.697788000 | 3.273392000 |
| H | -1.751905000 | 4.205940000 | 3.599925000 |
| O | -5.831102000 | 2.776874000 | 1.885839000 |
| C | -5.844268000 | 2.499895000 | 3.102655000 |
| O | -6.506304000 | 2.067099000 | 3.994105000 |
| H | -4.530522000 | 3.547995000 | 3.963858000 |

**22. Reaction intermediate 4: [Ru<sup>II</sup>(terpy)(N<sup>^</sup>N)(H)(CO<sub>2</sub>)]<sup>+</sup> ( $\Delta E = 0.34$  eV)**

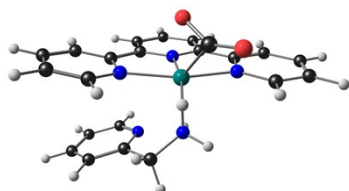

|    |              |              |              |
|----|--------------|--------------|--------------|
| Ru | -3.760314000 | 3.048480000  | 3.013180000  |
| N  | -2.846879000 | 1.353441000  | 3.743375000  |
| C  | -3.349757000 | 0.496476000  | 4.653053000  |
| H  | -4.271906000 | 0.809891000  | 5.129013000  |
| C  | -2.737728000 | -0.712284000 | 4.966381000  |
| H  | -3.191307000 | -1.367029000 | 5.704537000  |
| C  | -1.552057000 | -1.055541000 | 4.321210000  |
| H  | -1.046298000 | -1.990462000 | 4.545482000  |
| C  | -1.031279000 | -0.186151000 | 3.366036000  |
| H  | -0.123882000 | -0.442390000 | 2.830908000  |
| C  | -1.692767000 | 1.004040000  | 3.074116000  |
| C  | -1.273894000 | 1.924385000  | 2.001937000  |
| C  | -0.133045000 | 1.836296000  | 1.205180000  |
| H  | 0.596596000  | 1.049397000  | 1.357831000  |
| C  | 0.055042000  | 2.785275000  | 0.196878000  |
| H  | 0.938199000  | 2.731377000  | -0.433512000 |
| C  | -0.878853000 | 3.800172000  | -0.010662000 |

|   |              |             |              |
|---|--------------|-------------|--------------|
| H | -0.725889000 | 4.533814000 | -0.793911000 |
| C | -2.005412000 | 3.850422000 | 0.815731000  |
| N | -2.159915000 | 2.922240000 | 1.784973000  |
| C | -3.097453000 | 4.833644000 | 0.791928000  |
| C | -3.179266000 | 5.876246000 | -0.130070000 |
| H | -2.411743000 | 5.982044000 | -0.888698000 |
| C | -4.245737000 | 6.768469000 | -0.079448000 |
| H | -4.319893000 | 7.576901000 | -0.801357000 |
| C | -5.213135000 | 6.601651000 | 0.910608000  |
| H | -6.067396000 | 7.267910000 | 0.986105000  |
| C | -5.092014000 | 5.544770000 | 1.805142000  |
| H | -5.842618000 | 5.348616000 | 2.562366000  |
| N | -4.069130000 | 4.664266000 | 1.759910000  |
| N | -0.169108000 | 3.732865000 | 4.517598000  |
| C | 1.083988000  | 3.262103000 | 4.443309000  |
| H | 1.683515000  | 3.620718000 | 3.607471000  |
| C | 1.618640000  | 2.367552000 | 5.367971000  |
| H | 2.644893000  | 2.024460000 | 5.271296000  |
| C | 0.805476000  | 1.932669000 | 6.415921000  |
| H | 1.183101000  | 1.232469000 | 7.157101000  |
| C | -0.499912000 | 2.408333000 | 6.496536000  |
| H | -1.166447000 | 2.087512000 | 7.292952000  |
| C | -0.939070000 | 3.314148000 | 5.529106000  |
| C | -2.321983000 | 3.920701000 | 5.606438000  |
| H | -2.296438000 | 4.762469000 | 6.312274000  |
| H | -3.050020000 | 3.194106000 | 5.969433000  |
| N | -2.743476000 | 4.406158000 | 4.269681000  |
| H | -1.883509000 | 4.720777000 | 3.806499000  |
| H | -3.355609000 | 5.210336000 | 4.378104000  |
| O | -5.109799000 | 1.742038000 | 1.982922000  |
| C | -5.774098000 | 2.611905000 | 2.581105000  |
| O | -6.858252000 | 3.082385000 | 2.725206000  |
| H | -4.856164000 | 3.066931000 | 4.199955000  |

**23. Reaction intermediate 5: [Ru<sup>II</sup>(terpy)(N<sup>+</sup>N)(H)(CO<sub>2</sub>)]<sup>+</sup> ( $\Delta E = 0.13$  eV)**

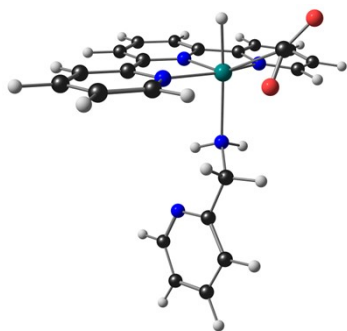

|    |              |             |             |
|----|--------------|-------------|-------------|
| Ru | -3.867824000 | 2.874625000 | 2.648624000 |
| N  | -3.560596000 | 0.870989000 | 2.949251000 |
| C  | -4.007830000 | 0.109111000 | 3.965114000 |

|   |              |              |              |
|---|--------------|--------------|--------------|
| H | -4.591172000 | 0.627751000  | 4.717997000  |
| C | -3.741602000 | -1.252305000 | 4.045906000  |
| H | -4.119937000 | -1.822395000 | 4.889236000  |
| C | -2.987811000 | -1.856376000 | 3.040007000  |
| H | -2.759344000 | -2.917668000 | 3.078069000  |
| C | -2.534727000 | -1.078510000 | 1.978110000  |
| H | -1.955864000 | -1.527154000 | 1.178858000  |
| C | -2.832724000 | 0.283244000  | 1.942191000  |
| C | -2.466018000 | 1.184002000  | 0.843074000  |
| C | -1.781432000 | 0.847257000  | -0.322431000 |
| H | -1.411284000 | -0.161053000 | -0.466760000 |
| C | -1.589112000 | 1.816417000  | -1.309050000 |
| H | -1.065213000 | 1.559810000  | -2.224872000 |
| C | -2.063668000 | 3.111963000  | -1.117941000 |
| H | -1.908944000 | 3.871514000  | -1.875513000 |
| C | -2.724256000 | 3.426339000  | 0.070854000  |
| N | -2.917091000 | 2.462667000  | 1.012417000  |
| C | -3.221735000 | 4.730569000  | 0.498436000  |
| C | -3.121061000 | 5.895559000  | -0.262644000 |
| H | -2.693484000 | 5.851724000  | -1.258113000 |
| C | -3.563454000 | 7.104580000  | 0.261350000  |
| H | -3.496926000 | 8.016908000  | -0.324278000 |
| C | -4.082664000 | 7.120124000  | 1.555745000  |
| H | -4.432937000 | 8.039755000  | 2.014797000  |
| C | -4.172750000 | 5.929555000  | 2.264501000  |
| H | -4.602586000 | 5.907338000  | 3.258308000  |
| N | -3.777900000 | 4.741384000  | 1.758952000  |
| N | 0.345844000  | 2.404760000  | 4.945113000  |
| C | 1.593645000  | 2.221832000  | 5.400078000  |
| H | 2.329339000  | 1.885701000  | 4.669838000  |
| C | 1.966101000  | 2.439173000  | 6.727439000  |
| H | 2.992405000  | 2.274168000  | 7.043678000  |
| C | 0.993271000  | 2.874631000  | 7.625837000  |
| H | 1.242874000  | 3.061661000  | 8.667571000  |
| C | -0.306586000 | 3.074489000  | 7.163459000  |
| H | -1.091431000 | 3.420068000  | 7.831860000  |
| C | -0.582672000 | 2.824328000  | 5.818016000  |
| C | -1.985195000 | 2.964687000  | 5.260227000  |
| H | -2.576071000 | 3.679948000  | 5.835446000  |
| H | -2.491438000 | 1.996850000  | 5.335521000  |
| N | -1.987333000 | 3.359690000  | 3.834274000  |
| H | -1.178366000 | 2.886704000  | 3.421112000  |
| H | -1.769389000 | 4.353069000  | 3.771717000  |
| O | -5.037330000 | 3.055187000  | 4.473996000  |
| C | -5.653046000 | 3.589470000  | 3.539852000  |
| O | -6.586405000 | 4.233804000  | 3.190357000  |
| H | -5.160892000 | 2.447222000  | 1.836348000  |

24. Reaction intermediate 6:  $[\text{Ru}^{\text{II}}(\text{terpy})(\text{N}^{\wedge}\text{N})(\text{H})(\text{CO}_2)]^+$  ( $\Delta E = 0.00 \text{ eV}$ )

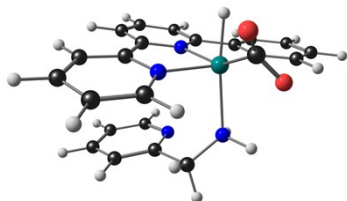

|    |              |              |              |
|----|--------------|--------------|--------------|
| Ru | -3.820076000 | 2.882583000  | 2.866725000  |
| N  | -3.092589000 | 1.156240000  | 3.750954000  |
| C  | -3.597878000 | 0.480649000  | 4.805553000  |
| H  | -4.521429000 | 0.862823000  | 5.220607000  |
| C  | -3.005347000 | -0.660338000 | 5.327349000  |
| H  | -3.469291000 | -1.161342000 | 6.171817000  |
| C  | -1.842099000 | -1.154560000 | 4.736994000  |
| H  | -1.368485000 | -2.058657000 | 5.108671000  |
| C  | -1.301190000 | -0.465419000 | 3.659327000  |
| H  | -0.390189000 | -0.812823000 | 3.185417000  |
| C  | -1.923545000 | 0.691685000  | 3.191301000  |
| C  | -1.381977000 | 1.542331000  | 2.140401000  |
| C  | -0.204353000 | 1.356426000  | 1.416570000  |
| H  | 0.395834000  | 0.467224000  | 1.569427000  |
| C  | 0.195906000  | 2.332450000  | 0.508939000  |
| H  | 1.112799000  | 2.203559000  | -0.058311000 |
| C  | -0.579859000 | 3.478891000  | 0.328960000  |
| H  | -0.272580000 | 4.242032000  | -0.376564000 |
| C  | -1.763857000 | 3.623726000  | 1.046107000  |
| N  | -2.135711000 | 2.655424000  | 1.934664000  |
| C  | -2.735051000 | 4.715038000  | 0.925900000  |
| C  | -2.586739000 | 5.816678000  | 0.083754000  |
| H  | -1.688857000 | 5.923112000  | -0.514185000 |
| C  | -3.594359000 | 6.774502000  | 0.015608000  |
| H  | -3.485702000 | 7.638601000  | -0.633614000 |
| C  | -4.742259000 | 6.603789000  | 0.789517000  |
| H  | -5.554315000 | 7.324249000  | 0.764094000  |
| C  | -4.840841000 | 5.489411000  | 1.614175000  |
| H  | -5.711363000 | 5.306759000  | 2.234681000  |
| N  | -3.863236000 | 4.567129000  | 1.695705000  |
| N  | -0.501294000 | 4.257803000  | 4.333748000  |
| C  | 0.774797000  | 4.121889000  | 3.948128000  |
| H  | 1.121216000  | 4.813892000  | 3.181109000  |
| C  | 1.639787000  | 3.162806000  | 4.474572000  |
| H  | 2.668561000  | 3.101451000  | 4.130501000  |
| C  | 1.148154000  | 2.291788000  | 5.446678000  |
| H  | 1.785599000  | 1.523971000  | 5.878509000  |
| C  | -0.178013000 | 2.418583000  | 5.850843000  |
| H  | -0.602175000 | 1.753584000  | 6.598398000  |
| C  | -0.960727000 | 3.421545000  | 5.275434000  |
| C  | -2.383079000 | 3.651661000  | 5.730262000  |
| H  | -2.365547000 | 4.343477000  | 6.586213000  |

|   |              |             |             |
|---|--------------|-------------|-------------|
| H | -2.829627000 | 2.715899000 | 6.071310000 |
| N | -3.187607000 | 4.204652000 | 4.625513000 |
| H | -2.648756000 | 4.974999000 | 4.228872000 |
| H | -4.059910000 | 4.584157000 | 4.988252000 |
| O | -5.819156000 | 3.299137000 | 3.612096000 |
| C | -5.723723000 | 2.093042000 | 3.340571000 |
| O | -6.224608000 | 1.017715000 | 3.353475000 |
| H | -4.402616000 | 2.087533000 | 1.628260000 |
